# Supplementary material for: Electron donor–acceptor complex enabled cascade reaction of unprotectedo-anilide aryl chlorides for heterocycle synthesis
Source: Royal Society of Chemistry journal article supplement (doi:10.1039/d2qo01863b), 2023-01-01
Supplement: d2qo01863b1.pdf [file d2qo01863b1.pdf]

## *Supporting Information*

### **Electron Donor-Acceptor Complex Enabled Cascade Reaction of Unprotected o-Anilide Aryl Chlorides for Heterocycle Synthesis**

Zhu-Sheng Yang,<sup>a,b†</sup> Wen-Xin Tang,<sup>b,d†</sup> Bei-Bei Zhang,<sup>b</sup> De-Qun Sun,<sup>d\*</sup> Kun-Quan Chen<sup>b\*</sup> and Xiang-Yu Chen<sup>b,c\*</sup>

<sup>a</sup> *School of Materials and Architectural Engineering, Guizhou Normal University, Guiyang, 550025 China.*

<sup>b</sup> *School of Chemical Sciences, University of Chinese Academy of Sciences, Beijing 100049 China. E-mail: [ckq@ucas.ac.cn](mailto:ckq@ucas.ac.cn), [chenxiangyu20@ucas.ac.cn](mailto:chenxiangyu20@ucas.ac.cn)*

<sup>c</sup> *Binzhou Institute of Technology, Weiqiao-UCAS Science and Technology Park, Binzhou, Shandong Province, 256606 China. E-mail: [chenxiangyu20@ucas.ac.cn](mailto:chenxiangyu20@ucas.ac.cn)*

<sup>d</sup> *School of Life Science and Engineering, Southwest University of Science and Technology, Mianyang, 621010 China. E-mail: [dqsun@swust.edu.cn](mailto:dqsun@swust.edu.cn)*

## Table of Contents

|                                                   |     |
|---------------------------------------------------|-----|
| <b>1. General Information</b> .....               | S3  |
| <b>2. Experimental Procedures</b> .....           | S5  |
| <b>3. General Procedure</b> .....                 | S5  |
| <b>4. Mechanism Studies</b> .....                 | S6  |
| 4.1 UV/Vis absorption spectrometry.....           | S6  |
| 4.2 TEMPO trapping experiment .....               | S6  |
| 4.3 Evidence for 1,5-HAT .....                    | S8  |
| 4.4 Density functional theory (DFT) studies ..... | S9  |
| 4.5 Quantum yield determination .....             | S9  |
| <b>5. Compound Characterization Data</b> .....    | S11 |
| <b>6. NMR Spectra</b> .....                       | S17 |
| <b>7. Computational Details</b> .....             | S39 |
| <b>8. Reference</b> .....                         | S45 |

## 1. General Information

- Chemicals were purchased from Heowns, Innochem and Bidepharm, and they were used without further purification unless otherwise noted. The starting materials *o*-chloroanilines and *o*-chlorobenzamides were readily prepared according to the related literatures.<sup>1</sup> Solvents were purified using a solvent-purification system (VSPS-8, Vigor).
- Chromatographic purification of the products was performed on 200-300 mesh silica gel.
- IR spectra were taken on a Vertex 70 spectrophotometer and reported as wave numbers (cm<sup>-1</sup>).
- UV/vis absorption spectra were acquired on a UV-5 spectrophotometer (METTLER TOLEDO).
- The GC-MS TQ8040 was used in the detection of the reaction mixture.
- The SGW X-4 was used to measure the melting point of solids.
- HRMS were obtained on an IonSpec FT-ICR mass spectrometer with ESI resource. The mass analysis mode of the HRMS was orbitrap.
- <sup>1</sup>H-, <sup>19</sup>F- and <sup>13</sup>C- NMR spectra were recorded at ambient temperature on JEOL JNM-LA400 Spectrometer and JEOL JNM-LA500 Spectrometer and The chemical shifts are reported in ppm downfield of tetramethylsilane (TMS) and referenced to residual solvent peaks resonance as the internal standard. The order of citation in parentheses is a) multiplicity (s = singlet, d = doublet, t = triplet, q = quartet, dd = doublet of doublet, m = multiplet), b) coupling constants, c) number of protons. Coupling constants (*J*) are reported in Hertz (Hz).
- Photochemical experiments were performed magnetically stirred in 10 mL glass tubes, sealed with a rubber septum. The tubes were irradiated with blue light (450 nm) using a LED lamp (kelo-A0100s blue LED). The distance from the light source to the irradiation vessel was 1 cm and a fan was used to keep the reaction temperature at 50 ± 5 °C. (The purchase link for LED lamp is <https://item.jd.com/52714507033.html>)

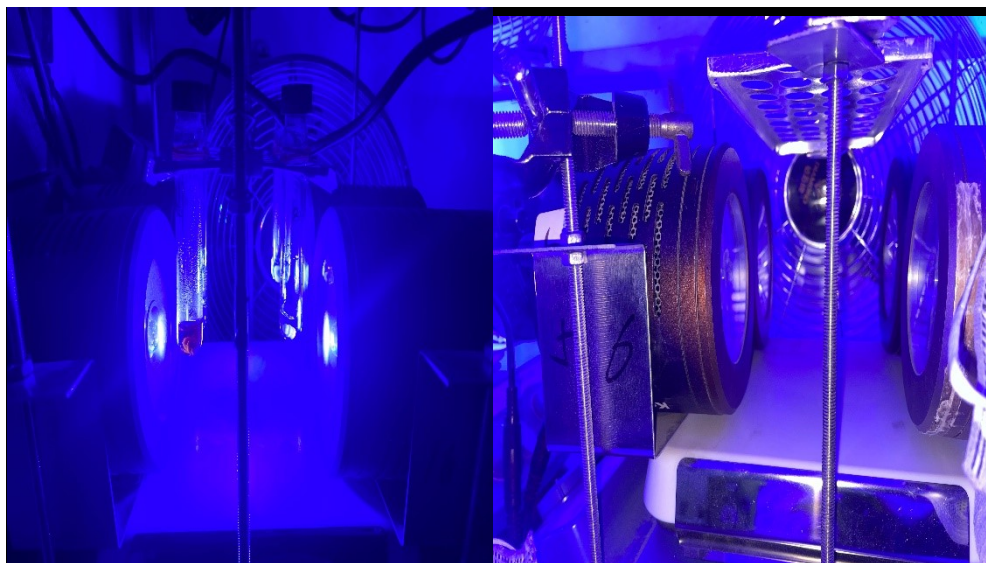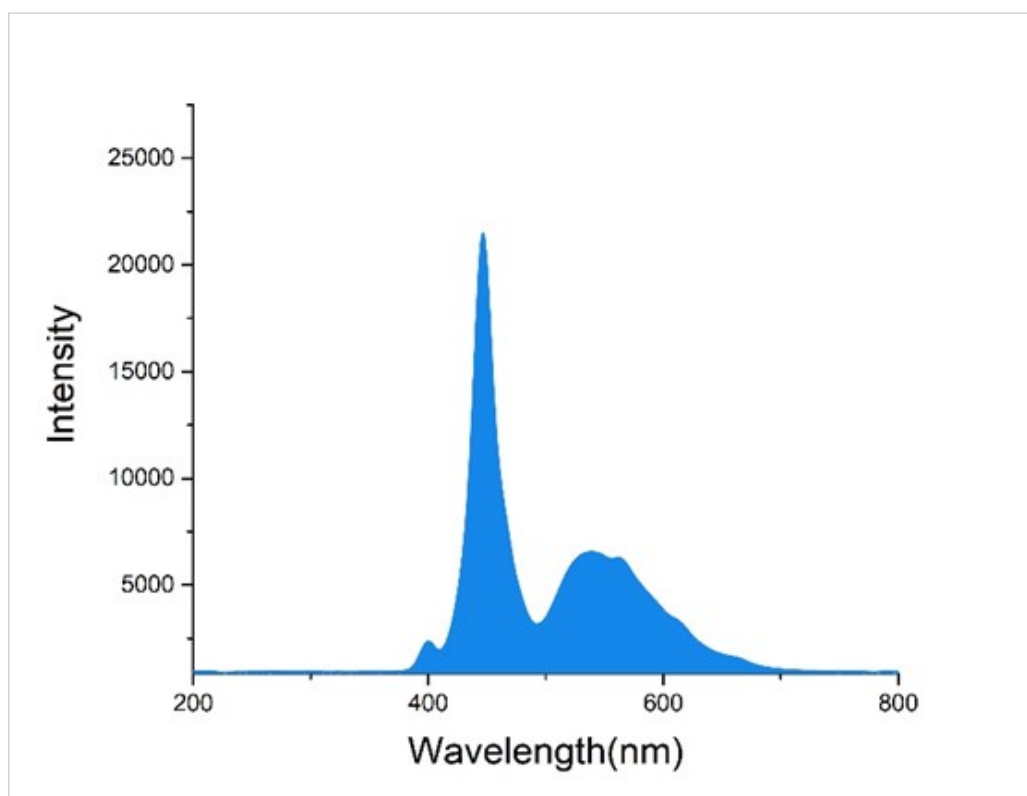

**Figure S1.** The spectra of blue LEDs employed in the reaction.

## 2. Experimental Procedures

### Scheme S1. Optimization of the reaction conditions.

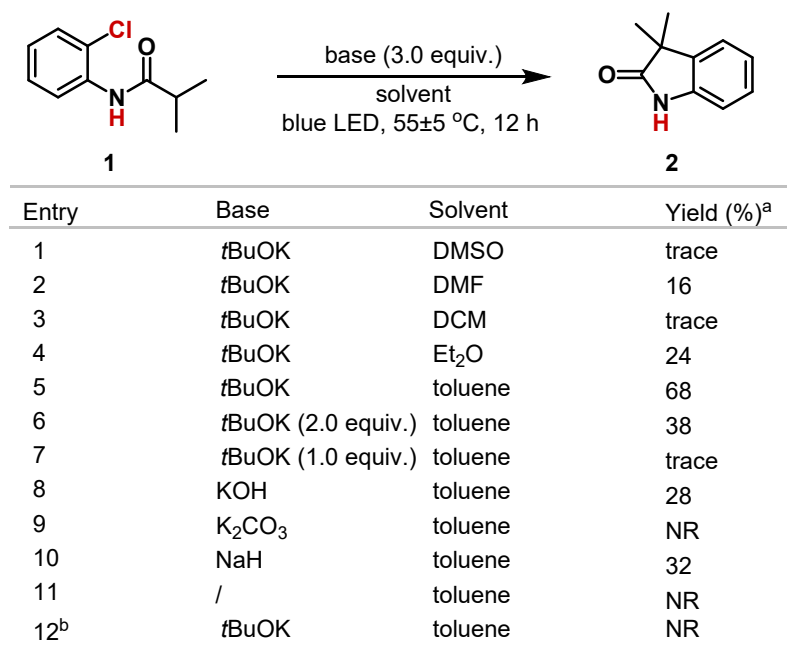

<sup>a</sup>Yield of isolated product after chromatography. <sup>b</sup>Without blue LED at 60 °C

### 3. General Procedure

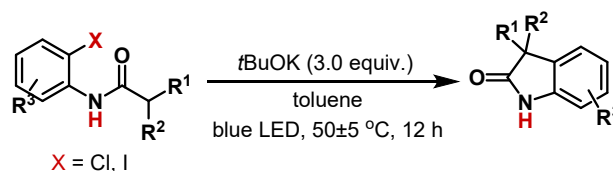

**General procedure A:** In a nitrogen atmosphere, to a dry tube equipped with a stirring bar, the *o*-iodobenzamides or *o*-chlorobenzamides (0.2 mmol), *t*BuOK (0.6 mmol, 67.2 mg, 3.0 equiv.) and toluene (2.0 mL) were added, the mixture was stirred under a 100 W blue LED (450 nm) lamp with an interval of 1 cm from the lamp and a fan was used to keep the reaction temperature at 50 ± 5 °C. After 12 hours, the reaction mixture was subjected to silica gel chromatography to afford the desired product (PE/EA = 3:1 – 1:1).

## 4. Mechanism Studies

### 4.1 UV/Vis absorption spectrometry

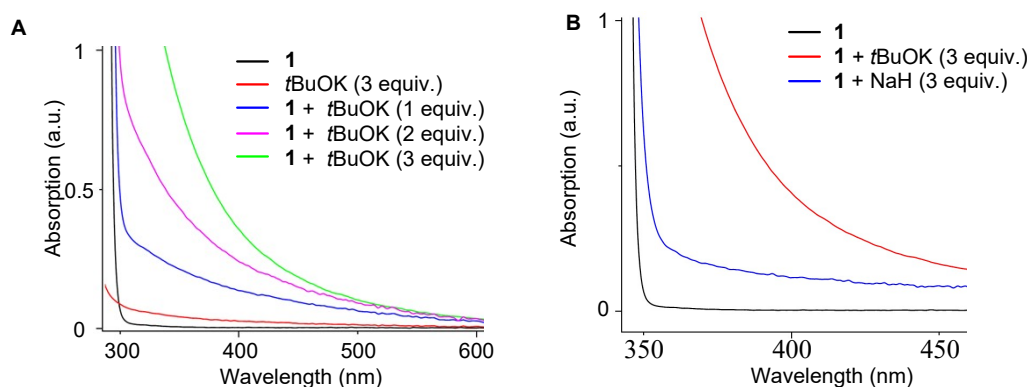

**Figure S2:** (A). Absorption spectra of substrate **1**, *t*BuOK and their mixture. The UV/vis spectra of *N*-(2-chlorophenyl)isobutyramide **1** ( $10^{-2}$  M in toluene), *t*BuOK ( $3 \times 10^{-2}$  M in toluene), **1** ( $10^{-2}$  M in toluene) and *t*BuOK ( $10^{-2}$  M in toluene), **1** ( $10^{-2}$  M in toluene) and *t*BuOK ( $2 \times 10^{-2}$  M in toluene), **1** ( $10^{-2}$  M in toluene) and *t*BuOK ( $3 \times 10^{-2}$  M in toluene). (B). Absorption spectra of substrate **1**, mixture of **1** and *t*BuOK, and mixture of **1** and NaH. The UV/vis spectra of *N*-(2-chlorophenyl)isobutyramide **1** ( $10^{-2}$  M in toluene), **1** ( $10^{-2}$  M in toluene) and *t*BuOK ( $3 \times 10^{-2}$  M in toluene), **1** ( $10^{-2}$  M in toluene) and NaH ( $3 \times 10^{-2}$  M in toluene).

### 4.2 TEMPO trapping experiment

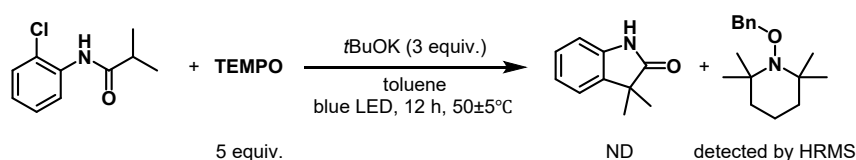

In a nitrogen atmosphere, to a dry tube equipped with a stirring bar, *N*-(2-chlorophenyl)isobutyramide **1** (0.2 mmol), TEMPO (1.0 mmol, 5.0 equiv.), *t*BuOK (0.6 mmol, 67.2 mg, 3.0 equiv.) and toluene (2.0 mL) were added, the mixture was stirred under a 100 W blue LED (450 nm) lamp for 12 hours. The benzyl radical trapped by TEMPO was detected by HRMS. **HRMS** (ESI):  $m/z$   $[M+H]^+$  calcd for  $C_{16}H_{25}ON^+$ : 248.2008; found: 248.2008.

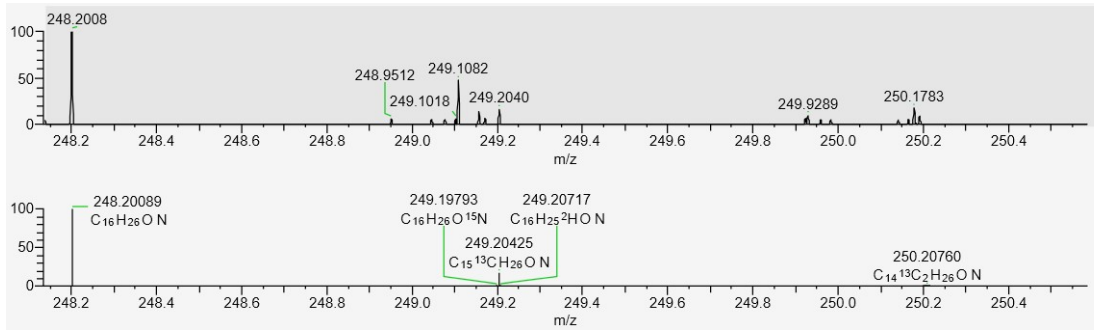

### 4.3 Evidence for 1,5-HAT

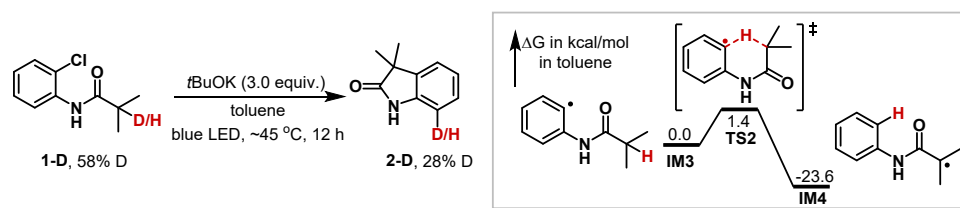

The experiment with **1-D** as the substrate afforded the desired oxindole **2-D** with 28% deuterium incorporation at the aromatic ring.

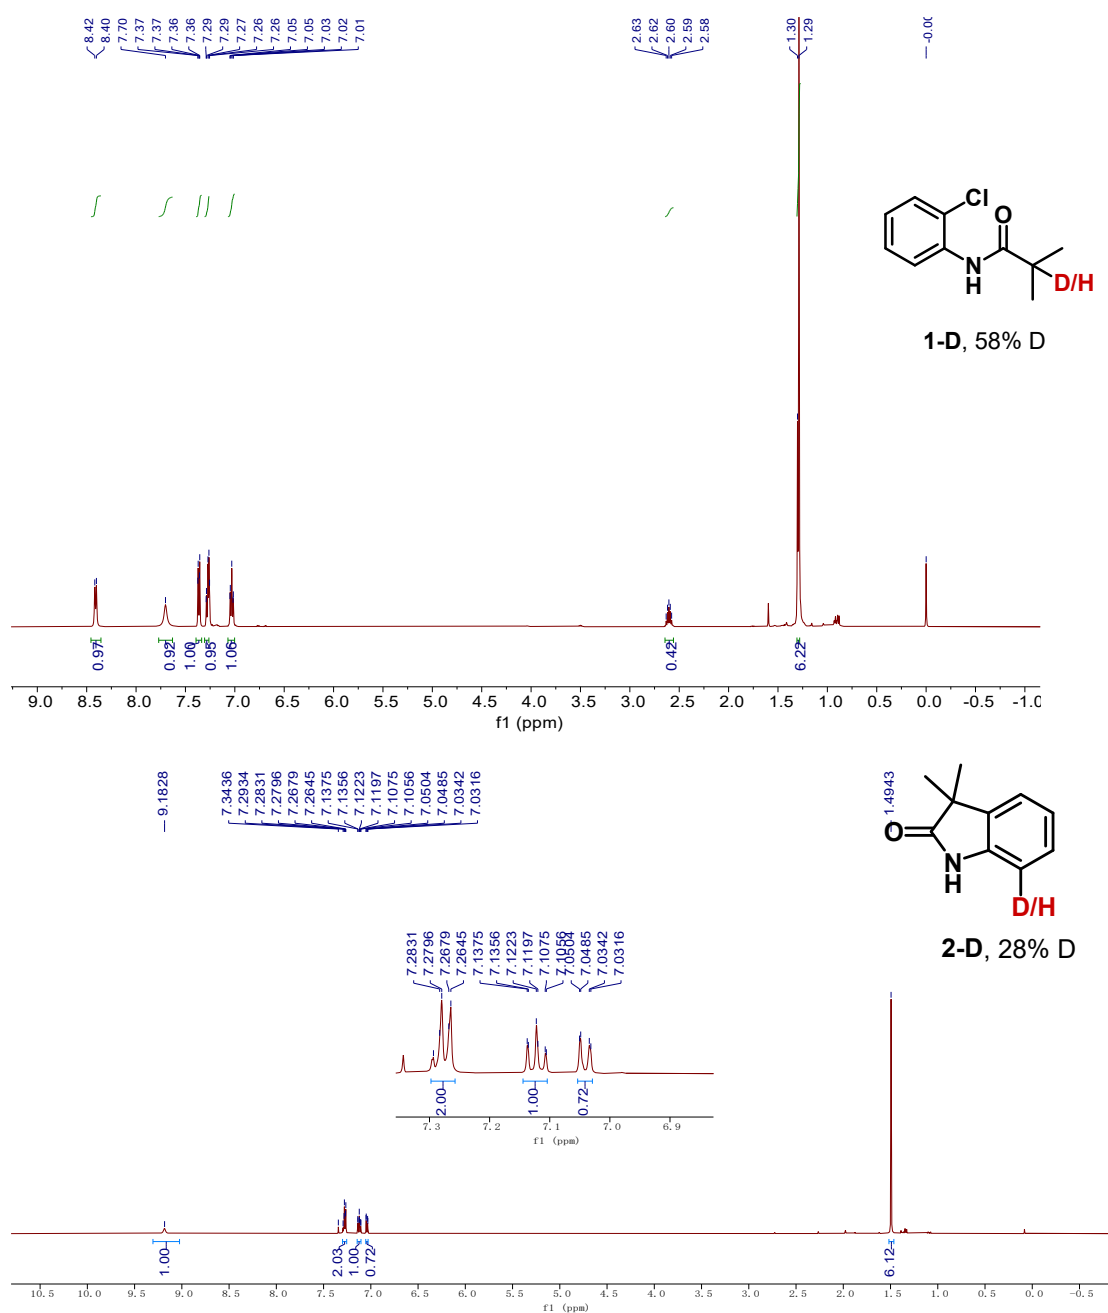

Figure S3. Evidence for 1,5-HAT.



#### 4.4 Density functional theory (DFT) studies

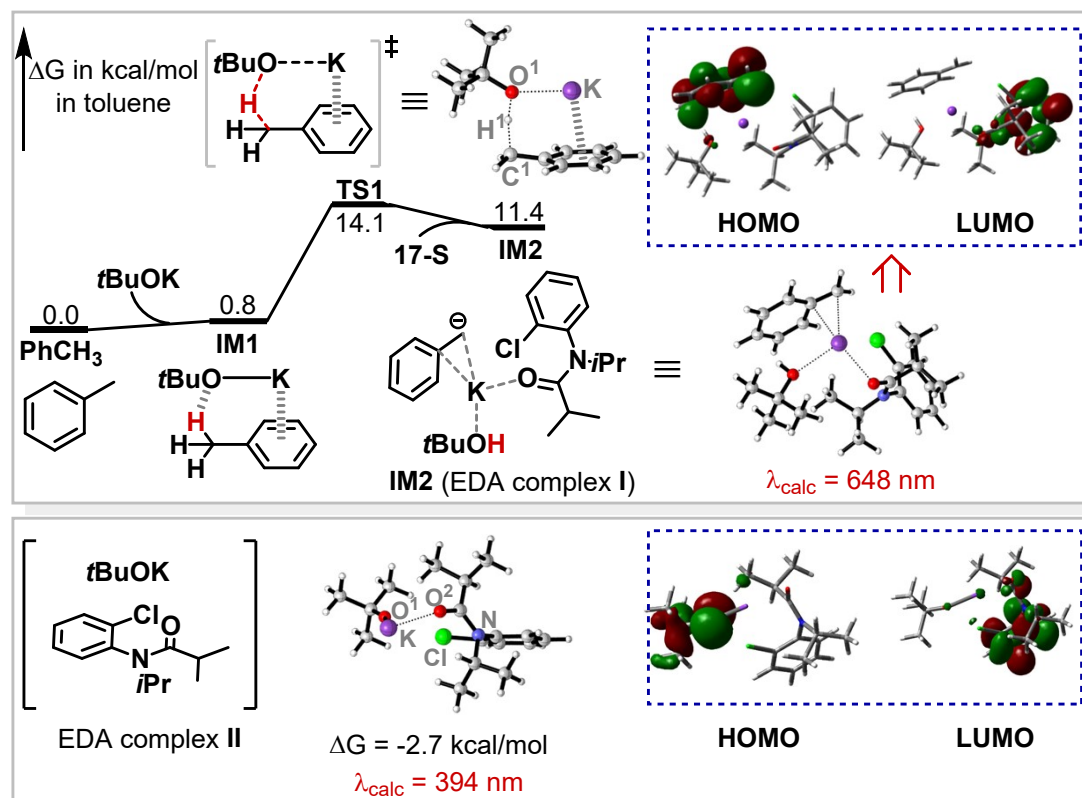

**Figure S4.** DFT studies.

We carried out density functional theory (DFT) and time-dependent DFT (TDDFT) calculations to further study the possible EDA complexes. We successfully located the possible EDA complexes **I** and **II**, showing that complex **I** has a  $\lambda_{\text{calc}} = 648$  nm, much longer than complex **II** ( $\lambda_{\text{calc}} = 394$  nm).

#### 4.5 Quantum yield determination

According to the procedure of Xu<sup>2</sup>: To an oven-dried 10 mL glass tubes sealed with rubber septum, *N*-(2-chlorophenyl)isobutyramide **1** (0.2 mmol) were combined in toluene (2 mL) under nitrogen atmosphere. The reaction mixture was stirred and irradiated ( $\lambda = 450$  nm, PLS-LED100C) for 2.0 h. After irradiation, the solution was measured the unit area photon flux (MQ-500 photosynthetic active radiation meter). And the yield of product formed was isolated. The quantum yield is calculated using the following equation:

$$\phi = \frac{\text{mol product}}{\text{flux} \cdot S \cdot t}$$

Where,  $\Phi$  is quantum yield,  $S$  (m<sup>2</sup>) is the irradiation area and  $t$  (s) is the photoreaction time.

Experiment: the unit photon flux was 665  $\mu\text{mol}\cdot\text{s}^{-1}\cdot\text{m}^{-2}$  (average of three experiments), the irradiation area was  $2.2 \times 10^{-4}$  m<sup>2</sup>, and the product yield was 9% after 2.0 h (7200 s).

Quantum yield calculation:

$$\phi = \frac{\text{mol product}}{\text{flux} \cdot S \cdot t} = \frac{0.09 \times 0.2 \times 10^3}{665 \times 2.2 \times 10^{-4} \times 7200} = 0.017$$

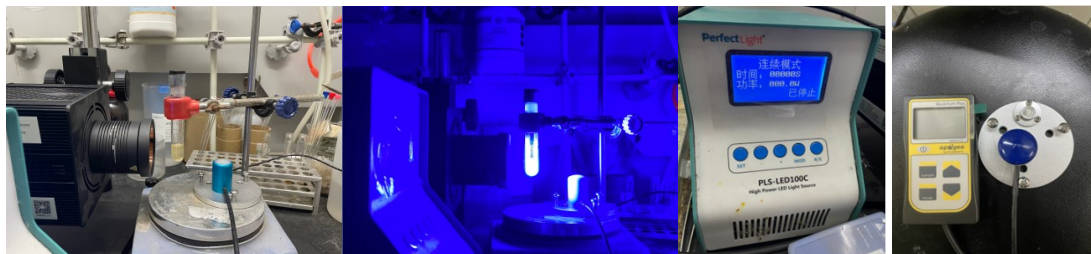

## 5. Compound Characterization Data

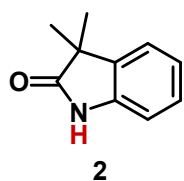

**3,3-Dimethylindolin-2-one (2):** Following the general procedure, the title product was obtained after purification by column chromatography (PE/EA = 3:1-1:1) as a white solid (36 mg, 0.177 mmol, 88%).  $^1\text{H NMR}$  (400 MHz,  $\text{CDCl}_3$ )  $\delta$  8.98 (s, 1H), 7.19 (d,  $J = 7.5$  Hz, 2H), 7.03 – 7.06 (m, 1H), 6.96 (d,  $J = 8.3$  Hz, 1H), 1.41 (s, 6H).  $^{13}\text{C NMR}$  (101 MHz,  $\text{CDCl}_3$ )  $\delta$  184.4, 140.0, 136.4, 127.7, 122.7, 122.5, 110.0, 44.8, 24.4. These data are in agreement with those reported previously in the literature.<sup>3</sup>

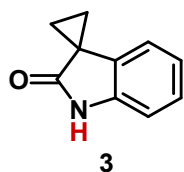

**Spiro[cyclopropane-1,3'-indolin]-2'-one (3):** Following the general procedure, the title product was obtained after purification by column chromatography (PE/EA = 3:1-1:1) as a white solid (29 mg, 0.166 mmol, 83%).  $^1\text{H NMR}$  (400 MHz,  $\text{CDCl}_3$ )  $\delta$  8.76 (s, 1H), 7.21 – 7.21 (m, 1H), 7.04 – 6.94 (m, 2H), 6.88 – 6.72 (m, 1H), 1.78 – 1.75 (m, 2H), 1.56 – 1.53 (m, 2H).  $^{13}\text{C NMR}$  (101 MHz,  $\text{CDCl}_3$ )  $\delta$  179.6, 140.7, 131.4, 126.9, 122.1, 118.7, 109.9, 27.6, 19.6. These data are in agreement with those reported previously in the literature.<sup>4</sup>

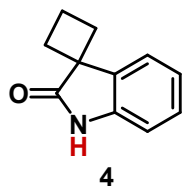

**Spiro[cyclobutane-1,3'-indolin]-2'-one (4):** Following the general procedure, the title product was obtained after purification by column chromatography (PE/EA = 3:1-1:1) as a white solid (31 mg, 0.166 mmol, 83%).  $^1\text{H NMR}$  (400 MHz,  $\text{CDCl}_3$ )  $\delta$  8.67 (s, 1H), 7.48 (d,  $J = 7.4$  Hz, 1H), 7.21 – 7.16 (m, 1H), 7.08 – 7.04 (m, 1H), 6.89 (d,  $J = 7.7$  Hz, 1H), 2.72 – 2.63 (m, 2H), 2.39 – 2.32 (m, 3H), 2.28 – 2.21 (m, 1H).  $^{13}\text{C NMR}$  (101 MHz,  $\text{CDCl}_3$ )  $\delta$  183.0, 140.3, 135.0, 127.9, 122.8, 122.7, 109.6, 48.7, 31.4, 16.9. These data are in agreement with those reported previously in the literature.<sup>5</sup>

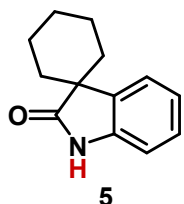

**Spiro[cyclohexane-1,3'-indolin]-2'-one (5):** Following the general procedure, the title product was obtained after purification by column chromatography (PE/EA = 3:1-1:1) as a white solid (33 mg, 0.142 mmol, 71%).  $^1\text{H NMR}$  (400 MHz,  $\text{CDCl}_3$ )  $\delta$  8.69 (s, 1H), 7.45 (d,  $J = 7.4$  Hz, 1H), 7.22 – 7.18 (m, 1H), 7.03 – 6.99 (m, 1H), 6.93 (d,  $J = 7.7$  Hz, 1H), 1.94 – 1.89 (m, 2H), 1.87 – 1.83 (m, 2H), 1.78 – 1.71 (m, 3H), 1.64 – 1.58 (m, 3H).  $^{13}\text{C NMR}$  (101 MHz,  $\text{CDCl}_3$ )  $\delta$  183.4, 140.1, 135.9, 127.5, 124.4, 122.0, 109.8, 48.1, 33.0, 25.3, 21.2. These data are in agreement with those reported previously in the literature.<sup>3</sup>

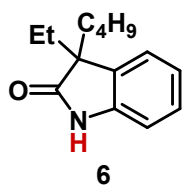

6

**3-Butyl-3-ethylindolin-2-one (6):** Following the general procedure, the title product was obtained after purification by column chromatography (PE/EA = 3:1-1:1) as a white solid M.P. 95 – 96 °C. (42 mg, 0.144 mmol, 72%). **<sup>1</sup>H NMR** (400 MHz, CDCl<sub>3</sub>) δ 8.55 (s, 1H), 7.25 – 7.15 (m, 1H), 7.12 (d, *J* = 7.4 Hz, 1H), 7.09 – 6.99 (m, 1H), 6.91 (d, *J* = 7.7 Hz, 1H), 2.00 – 1.85 (m, 2H), 1.83 – 1.73 (m, 2H), 1.32 – 1.13 (m, 2H), 1.11 – 0.99 (m, 1H), 0.89 – 0.80 (m, 1H), 0.76 (t, *J* = 7.3 Hz, 3H), 0.63 (t, *J* = 7.4 Hz, 3H). **<sup>13</sup>C NMR** (101 MHz, CDCl<sub>3</sub>) δ 182.9, 141.4, 133.0, 127.6, 123.2, 122.5, 109.6, 54.4, 37.7, 31.2, 26.5, 23.0, 14.0, 8.7. **IR (ATR)** ν 3205, 2959, 2929, 1700, 1619, 1470, 1192, 748, 652 cm<sup>-1</sup>. **HRMS (ESI):** *m/z* [M+H]<sup>+</sup> calcd for C<sub>14</sub>H<sub>20</sub>ON<sup>+</sup>: 218.1539; found: 218.1532.

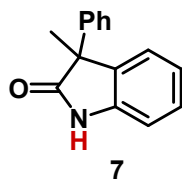

7

**3-Methyl-3-phenylindolin-2-one (7):** Following the general procedure, the title product was obtained after purification by column chromatography (PE/EA = 3:1-1:1) as a white solid M.P. 132 – 133 °C. (27 mg, 0.126 mmol, 63%). **<sup>1</sup>H NMR** (400 MHz, CDCl<sub>3</sub>) δ 8.70 (s, 1H), 7.33 – 7.31 (m, 3H), 7.31 – 7.28 (m, 1H), 7.27 – 7.26 (m, 1H), 7.24 – 7.22 (m, 1H), 7.13 (d, *J* = 7.4 Hz, 1H), 7.10 – 7.02 (m, 1H), 6.97 (d, *J* = 7.8 Hz, 1H), 1.82 (s, 3H). **<sup>13</sup>C NMR** (126 MHz, CDCl<sub>3</sub>) δ 182.1, 140.6, 140.4, 135.7, 128.7, 128.2, 127.4, 126.7, 124.5, 122.9, 110.2, 52.8, 23.5. **IR (ATR)** ν 3213, 2928, 1706, 1619, 1472, 1215, 715, 696 cm<sup>-1</sup>. **HRMS (ESI):** *m/z* [M+H]<sup>+</sup> calcd for C<sub>15</sub>H<sub>14</sub>ON<sup>+</sup>: 224.1069; found: 224.1062.

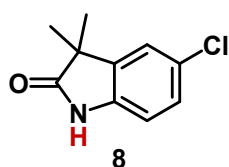

8

**5-Chloro-3,3-dimethylindolin-2-one (8):** Following the general procedure, the title product was obtained after purification by column chromatography (PE/EA = 3:1-1:1) as a colorless oil (36 mg, 0.166 mmol, 83%). **<sup>1</sup>H NMR** (500 MHz, CDCl<sub>3</sub>) δ 9.02 (s, 1H), 7.19 – 7.11 (m, 2H), 6.87 (d, *J* = 8.0 Hz, 1H), 1.38 (s, 6H). **<sup>13</sup>C NMR** (126 MHz, CDCl<sub>3</sub>) δ 183.7, 138.4, 138.1, 128.0, 127.8, 123.4, 111.0, 45.2, 24.3. These data are in agreement with those reported previously in the literature.<sup>3</sup>

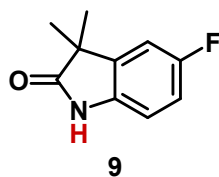

9

**5-Fluoro-3,3-dimethylindolin-2-one (9):** Following the general procedure, the title product was obtained after purification by column chromatography (PE/EA = 3:1-1:1) as a white solid (29 mg, 0.124 mmol, 62%). **<sup>1</sup>H NMR** (500 MHz, CDCl<sub>3</sub>) δ 9.52 (s, 1H), 6.94 – 6.82 (m, 3H), 1.39 (s, 6H). **<sup>13</sup>C NMR** (101 MHz, CDCl<sub>3</sub>) δ 184.6, 159.4 (d, *J* = 239.9 Hz), 138.0 (d, *J* = 7.7 Hz), 114.0 (d, *J* = 23.6 Hz), 110.8 (d, *J* = 3.9 Hz), 110.6 (d, *J* = 12.5 Hz), 45.5, 24.3. **<sup>19</sup>F NMR** (471 MHz, CDCl<sub>3</sub>) δ -

120.6 (q,  $J = 7.3$  Hz). These data are in agreement with those reported previously in the literature.

6

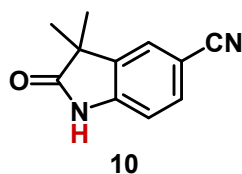

**3,3-Dimethyl-2-oxoindoline-5-carbonitrile (10)** Following the general procedure, the title product was obtained after purification by column chromatography (PE/EA = 3:1-1:1) as a yellow solid (22 mg, 0.114 mmol, 57%).  $^1\text{H NMR}$ (400 MHz,  $\text{CDCl}_3$ )  $\delta$  9.30 (s, 1H), 7.55 (d,  $J = 9.7$  Hz, 1H), 7.47 (s, 1H), 7.05 (d,  $J = 8.0$  Hz, 1H), 1.43 (s, 6H).  $^{13}\text{C NMR}$ (101 MHz,  $\text{CDCl}_3$ )  $\delta$  183.8, 144.1, 137.3, 133.1, 126.4, 119.3, 110.6, 105.9, 44.8, 24.2. These data are in agreement with those reported previously in the literature.<sup>7</sup>

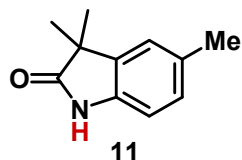

**3,3,5-Trimethylindolin-2-one (11)**: Following the general procedure, the title product was obtained after purification by column chromatography (PE/EA = 3:1-1:1) as a white solid (35 mg, 0.150 mmol, 75%).  $^1\text{H NMR}$  (500 MHz,  $\text{CDCl}_3$ )  $\delta$  8.71 (s, 1H), 7.01 – 6.99 (m, 2H), 6.82 (d,  $J = 7.4$  Hz, 1H), 2.32 (s, 3H), 1.38 (s, 6H).  $^{13}\text{C NMR}$  (101 MHz,  $\text{CDCl}_3$ )  $\delta$  184.3, 137.5, 136.5, 132.0, 128.0, 123.5, 109.7, 44.8, 24.5, 21.3. These data are in agreement with those reported previously in the literature.<sup>3</sup>

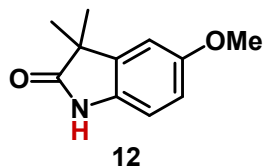

**5-Methoxy-3,3-dimethylindolin-2-one (12)**: Following the general procedure, the title product was obtained after purification by column chromatography (PE/EA = 3:1-1:1) as a white solid (33 mg, 0.142 mmol, 71%).  $^1\text{H NMR}$  (400 MHz,  $\text{CDCl}_3$ )  $\delta$  8.61 (s, 1H), 6.83 (d,  $J = 8.3$  Hz, 1H), 6.80 (d,  $J = 8.4$  Hz, 1H), 6.74 – 6.71 (m, 1H), 3.80 (s, 3H), 1.40 (s, 6H).  $^{13}\text{C NMR}$  (101 MHz,  $\text{CDCl}_3$ )  $\delta$  184.1, 156.0, 137.9, 133.3, 112.0, 110.3, 110.2, 55.9, 45.3, 24.5. These data are in agreement with those reported previously in the literature.<sup>3</sup>

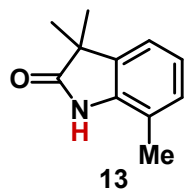

**3,3,7-Trimethylindolin-2-one (13)**: Following the general procedure, the title product was obtained after purification by column chromatography (PE/EA = 3:1-1:1) as a white solid (25 mg, 0.116 mmol, 58%).  $^1\text{H NMR}$  (500 MHz,  $\text{CDCl}_3$ )  $\delta$  8.77 (s, 1H), 7.04 – 7.02 (m, 2H), 6.97 (d,  $J = 7.1$  Hz, 1H), 2.31 (s, 3H), 1.40 (s, 6H).  $^{13}\text{C NMR}$  (126 MHz,  $\text{CDCl}_3$ )  $\delta$  184.3, 138.7, 136.0, 129.1, 122.5, 120.1, 119.3, 45.1, 24.5, 16.6. These data are in agreement with those reported previously in the literature.<sup>8</sup>

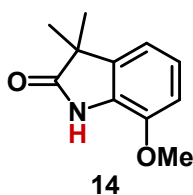

**7-Methoxy-3,3-dimethylindolin-2-one (14):** Following the general procedure, the title product was obtained after purification by column chromatography (PE/EA = 3:1-1:1) as a yellow solid M.P. 120 – 121 °C. (30 mg, 0.124 mmol, 62%).  $^1\text{H NMR}$  (400 MHz,  $\text{CDCl}_3$ )  $\delta$  7.44 (s, 1H), 7.05 – 6.97 (m, 1H), 6.83 (d,  $J = 7.5$  Hz, 1H), 6.79 (d,  $J = 8.2$  Hz, 1H), 3.88 (s, 3H), 1.39 (s, 6H).  $^{13}\text{C NMR}$  (126 MHz,  $\text{CDCl}_3$ )  $\delta$  182.6, 143.8, 137.1, 128.3, 123.1, 115.1, 110.1, 55.7, 45.4, 24.4. **IR (ATR)**  $\nu$  3219, 2965, 2927, 1703, 1461, 1260, 1053, 731  $\text{cm}^{-1}$ . **HRMS (ESI):**  $m/z$   $[\text{M}+\text{H}]^+$  calcd for  $\text{C}_{11}\text{H}_{14}\text{O}_2\text{N}^+$ : 192.1019; found: 192.1012.

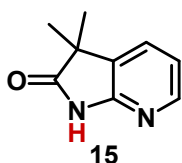

**3,3-Dimethyl-1,3-dihydro-2H-pyrrolo[2,3-b]pyridin-2-one (15):** Following the general procedure, the title product was obtained after purification by column chromatography (PE/EA = 3:1-1:1) as a colorless oil (45 mg, 0.167 mmol, 84%).  $^1\text{H NMR}$  (500 MHz,  $\text{CDCl}_3$ )  $\delta$  9.84 (s, 1H), 8.17 – 8.16 (m, 1H), 7.48 – 7.43 (m, 1H), 7.03 – 6.90 (m, 1H), 1.40 (s, 6H).  $^{13}\text{C NMR}$  (126 MHz,  $\text{CDCl}_3$ )  $\delta$  182.2, 155.6, 146.3, 130.59, 130.56, 118.3, 44.8, 24.0. These data are in agreement with those reported previously in the literature.<sup>3</sup>

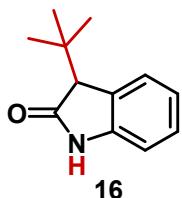

**3-(tert-Butyl)indolin-2-one (16):** Following the general procedure, the title product was obtained after purification by column chromatography (PE/EA = 3:1-1:1) as a white solid (32 mg, 0.119 mmol, 59%).  $^1\text{H NMR}$  (400 MHz,  $\text{CDCl}_3$ )  $\delta$  7.86 (s, 1H), 7.30 (s, 1H), 7.21 – 7.17 (m, 1H), 6.99 – 6.95 (m, 1H), 6.83 (d,  $J = 8.1$  Hz, 1H), 3.13 (s, 1H), 1.12 (s, 9H).  $^{13}\text{C NMR}$  (126 MHz,  $\text{CDCl}_3$ )  $\delta$  179.0, 142.1, 128.4, 128.0, 126.6, 121.7, 109.3, 56.0, 35.1, 27.5. These data are in agreement with those reported previously in the literature.<sup>9</sup>

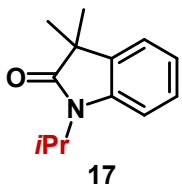

**1-Isopropyl-3,3-dimethylindolin-2-one (17):** Following the general procedure, the title product was obtained after purification by column chromatography (PE/EA = 3:1-1:1) as a white solid (32 mg, 0.112 mmol, 57%).  $^1\text{H NMR}$  (400 MHz,  $\text{CDCl}_3$ )  $\delta$  7.24 – 7.15 (m, 2H), 7.09 – 6.95 (m, 2H), 4.71 – 4.61 (m, 1H), 1.46 (d,  $J = 7.1$  Hz, 6H), 1.33 (s, 6H).  $^{13}\text{C NMR}$  (101 MHz,  $\text{CDCl}_3$ )  $\delta$  181.2, 141.3, 136.5, 127.5, 122.7, 122.0, 110.0, 44.0, 43.5, 24.6, 19.6. These data are in agreement with those reported previously in the literature.<sup>10</sup>

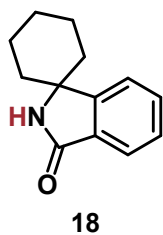

**Spiro[cyclohexane-1,1'-isoindolin]-3'-one (18):** Following the general procedure, the title product was obtained after purification by column chromatography (PE/EA = 3:1-1:1) as a white solid (33 mg, 0.142 mmol, 71%).  $^1\text{H NMR}$  (400 MHz,  $\text{CDCl}_3$ )  $\delta$  8.14 (s, 1H), 7.84 (d,  $J = 7.7$  Hz, 1H), 7.57 – 7.53 (m, 1H), 7.50 – 7.36 (m, 2H), 1.93 – 1.84 (m, 5H), 1.60 – 1.56 (m, 4H), 1.44 – 1.41 (m, 1H).  $^{13}\text{C NMR}$  (101 MHz,  $\text{CDCl}_3$ )  $\delta$  170.3, 153.2, 131.9, 131.1, 128.1, 124.1, 121.4, 62.0, 36.8, 25.2, 23.4. These data are in agreement with those reported previously in the literature.<sup>10</sup>

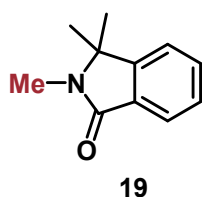

**1'-Methylspiro[cyclobutane-1,3'-indolin]-2'-one (19):** Following the general procedure, the title product was obtained after purification by column chromatography (PE/EA = 3:1-1:1) a colorless oil (29 mg, 0.155 mmol, 78%).  $^1\text{H NMR}$  (500 MHz,  $\text{CDCl}_3$ )  $\delta$  7.84 – 7.82 (m, 1H), 7.56 – 7.52 (m, 1H), 7.45 – 7.41 (m, 2H), 3.01 (s, 3H), 1.44 (s, 6H).  $^{13}\text{C NMR}$  (126 MHz,  $\text{CDCl}_3$ )  $\delta$  167.4, 151.6, 131.6, 131.0, 128.1, 123.7, 120.8, 62.2, 25.0, 24.0. These data are in agreement with those reported previously in the literature.<sup>10</sup>

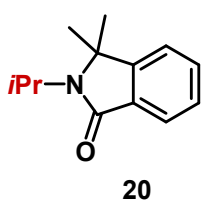

**2-Isopropyl-3,3-dimethylisoindolin-1-one (20):** Following the general procedure, the title product was obtained after purification by column chromatography (PE/EA = 3:1-1:1) as a white solid (18 mg, 0.090 mmol, 45%).  $^1\text{H NMR}$  (400 MHz,  $\text{CDCl}_3$ )  $\delta$  7.77 (d,  $J = 7.4$  Hz, 1H), 7.54 – 7.46 (m, 1H), 7.44 – 7.36 (m, 1H), 7.34 (d,  $J = 7.5$  Hz, 1H), 3.72 – 3.58 (m, 1H), 1.56 (d,  $J = 6.9$  Hz, 6H), 1.48 (s, 6H).  $^{13}\text{C NMR}$  (101 MHz,  $\text{CDCl}_3$ )  $\delta$  167.3, 151.4, 132.1, 131.3, 127.9, 123.2, 120.7, 63.3, 44.6, 25.5, 20.6. These data are in agreement with those reported previously in the literature.<sup>10</sup>

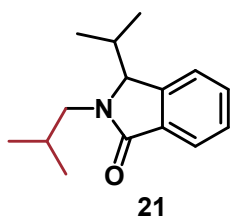

**2-Isobutyl-3-isopropylisoindolin-1-one (21):** Following the general procedure, the title product was obtained after purification by column chromatography (PE/EA = 3:1-1:1) as a white solid (23 mg, 0.106 mmol, 53%).  $^1\text{H NMR}$  (400 MHz,  $\text{CDCl}_3$ )  $\delta$  7.86 (d,  $J = 7.1$  Hz, 1H), 7.50 – 7.43 (m, 3H), 4.47 (d,  $J = 3.4$  Hz, 1H), 3.89 (dd,  $J = 14.0, 10.1$  Hz, 1H), 2.92 (dd,  $J = 14.0, 5.3$  Hz, 1H), 2.41 – 2.37 (m, 1H), 2.07 – 1.97 (m, 1H), 1.24 (d,  $J = 7.1$  Hz, 3H), 1.00 (d,  $J = 6.6$  Hz, 3H), 0.86 (d,  $J = 6.6$  Hz, 3H), 0.48 (d,  $J = 6.9$  Hz, 3H).  $^{13}\text{C NMR}$  (101 MHz,  $\text{CDCl}_3$ )  $\delta$  168.8, 143.4, 133.5, 130.8, 128.1, 123.8, 123.2, 64.3, 47.1, 28.8, 27.4, 20.7, 19.9, 19.2, 14.9. These data are in agreement with those reported previously in the literature.<sup>10</sup>

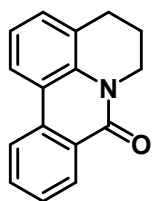

**22**

**5,6-Dihydro-4H,8H-pyrido[3,2,1-de]phenanthridin-8-one (22):** Following the general procedure, the title product was obtained after purification by column chromatography (PE/EA = 3:1-1:1) as a white solid (34 mg, 0.156 mmol, 78%). **<sup>1</sup>H NMR** (500 MHz, CDCl<sub>3</sub>) δ 8.54 (dd, *J* = 8.0, 1.0 Hz, 1H), 8.27 (d, *J* = 9.0 Hz, 1H), 8.13 (d, *J* = 8.9 Hz, 1H), 7.79 – 7.70 (m, 1H), 7.61 – 7.53 (m, 1H), 7.32 – 7.25 (m, 1H), 7.23 – 7.19 (m, 1H), 4.35 – 4.29 (m, 2H), 3.05 – 2.99 (m, 2H), 2.20 – 2.10 (m, 2H). **<sup>13</sup>C NMR** (126 MHz, CDCl<sub>3</sub>) δ 161.3, 134.6, 133.7, 132.4, 129.6, 128.6, 127.9, 125.7, 125.4, 122.0, 121.9, 121.4, 119.2, 42.9, 28.3, 20.8. These data are in agreement with those reported previously in the literature.<sup>10</sup>



## 6. NMR Spectra

$^1\text{H}$  NMR of compound **2** (500 MHz in  $\text{CDCl}_3$ )

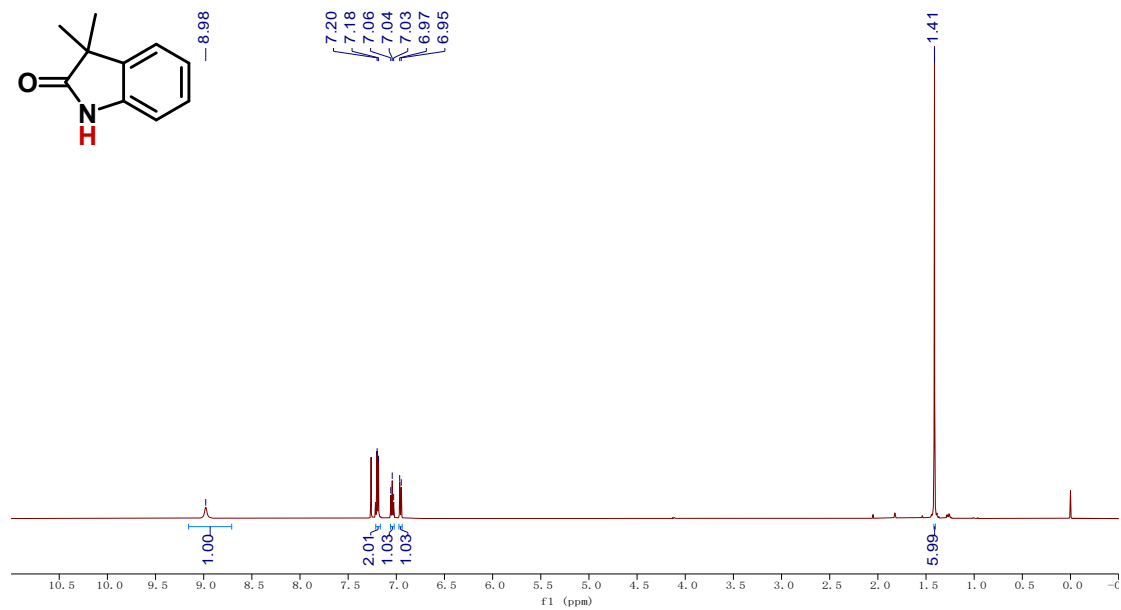

$^{13}\text{C}$  NMR of compound **2** (126 MHz in  $\text{CDCl}_3$ )

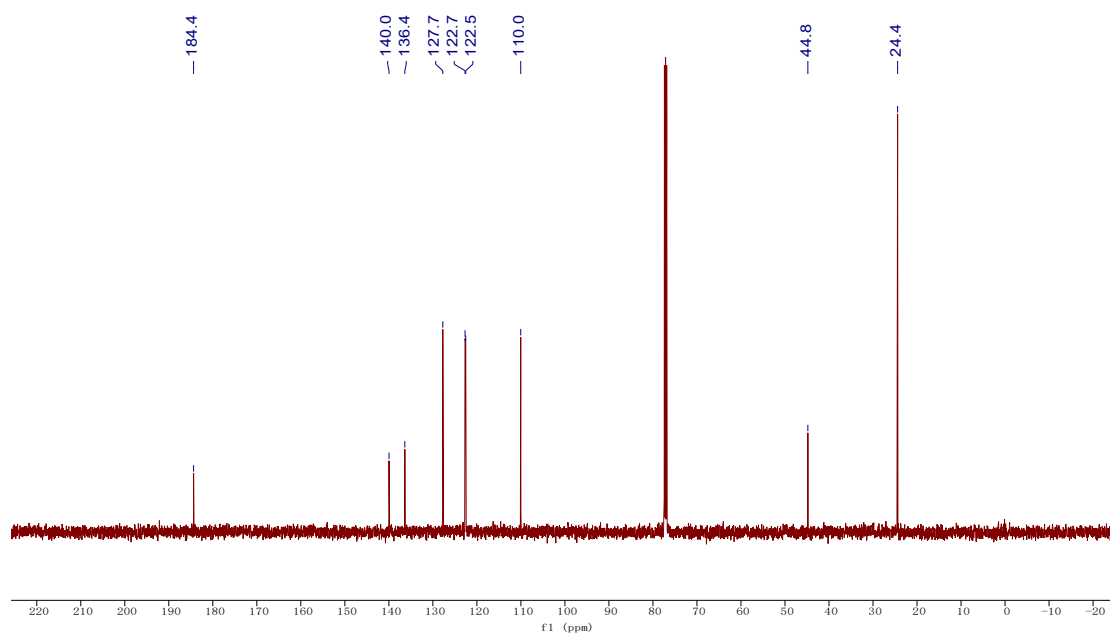

**<sup>1</sup>H NMR of compound 3 (400 MHz in CDCl<sub>3</sub>)**

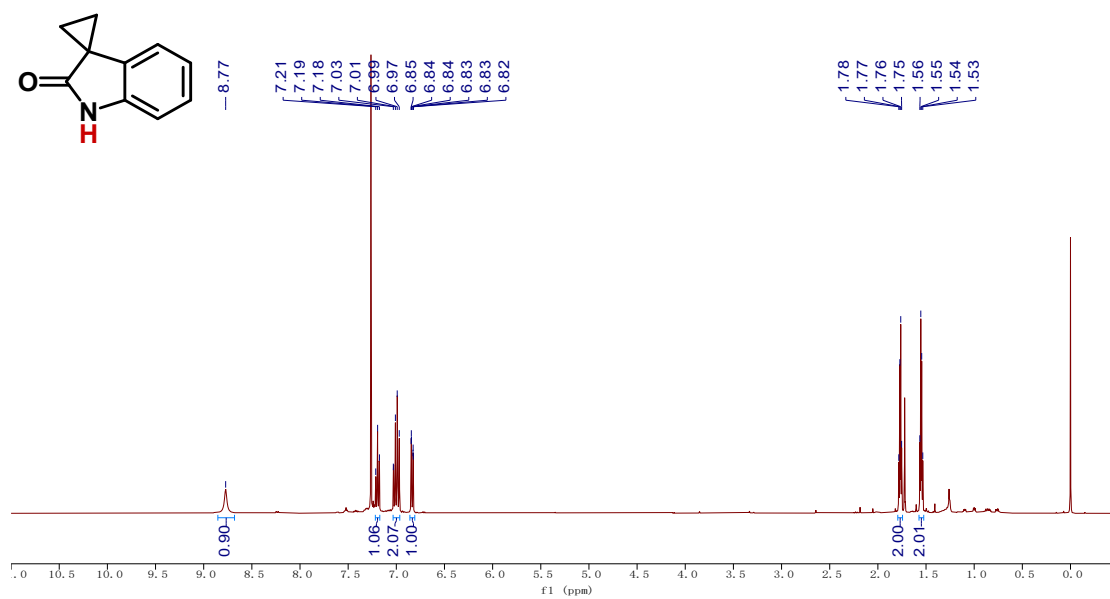

**<sup>13</sup>C NMR of compound 3 (101 MHz in CDCl<sub>3</sub>)**

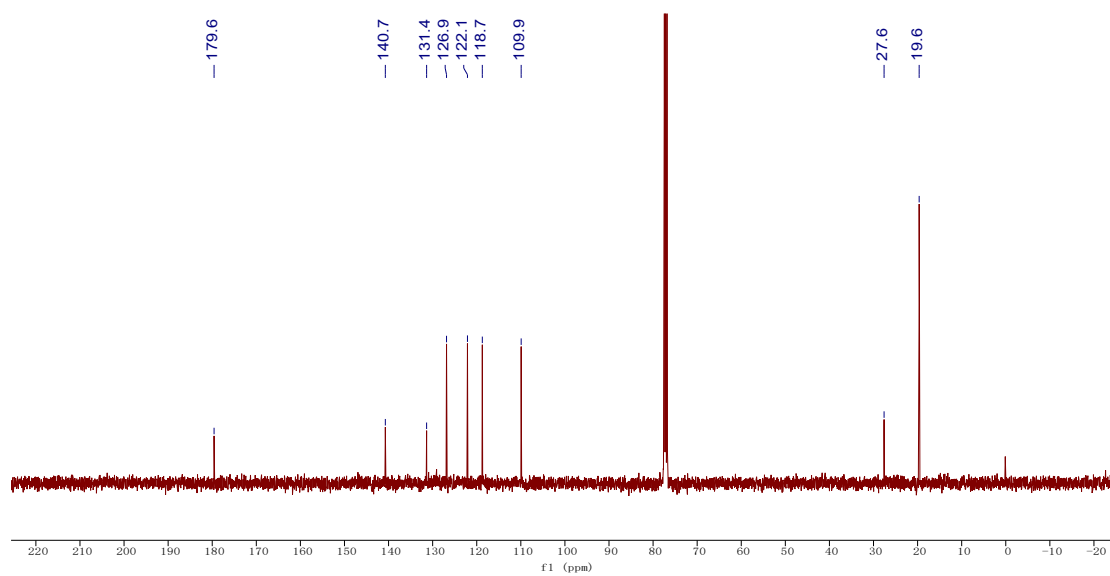

**<sup>1</sup>H NMR of compound 4 (400 MHz in CDCl<sub>3</sub>)**

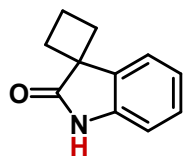

8.67  
7.49  
7.47  
7.21  
7.18  
7.16  
7.08  
7.06  
7.04  
6.90  
6.88

2.72  
2.68  
2.67  
2.66  
2.64  
2.63  
2.39  
2.38  
2.38  
2.36  
2.34  
2.33  
2.32  
2.28  
2.25  
2.24  
2.21

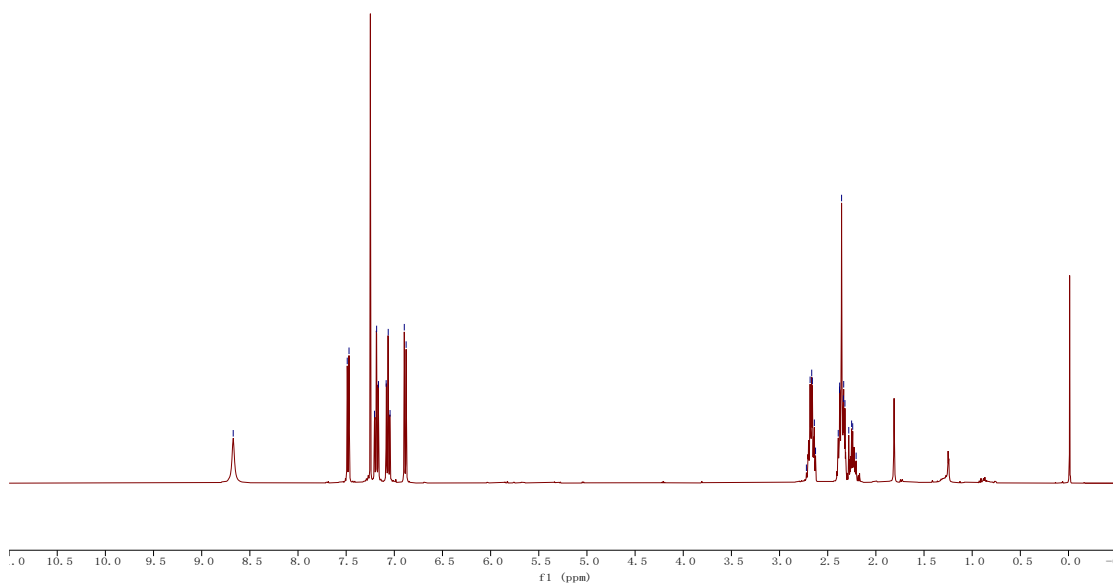

**<sup>13</sup>C NMR of compound 4 (101 MHz in CDCl<sub>3</sub>)**

183.0  
140.3  
135.0  
127.9  
122.8  
122.7  
109.6  
48.7  
31.4  
16.9

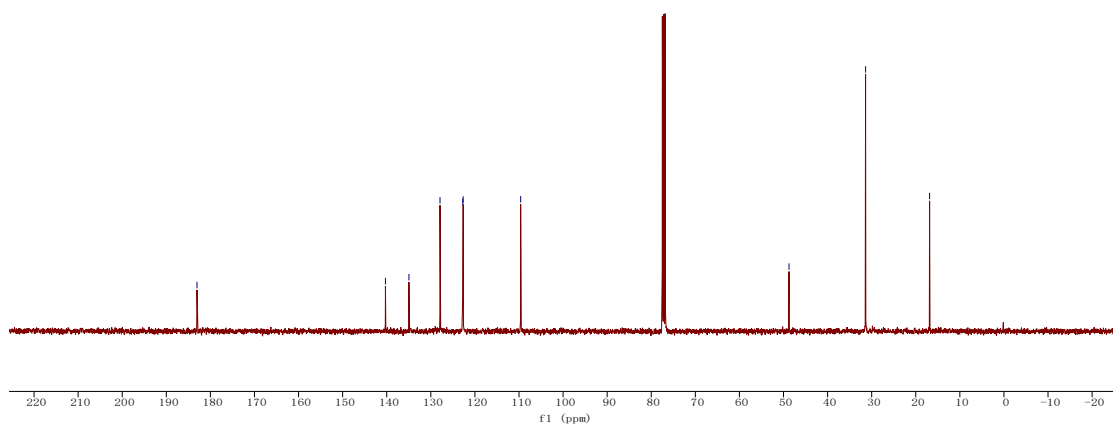

**<sup>1</sup>H NMR of compound 5 (400 MHz in CDCl<sub>3</sub>)**

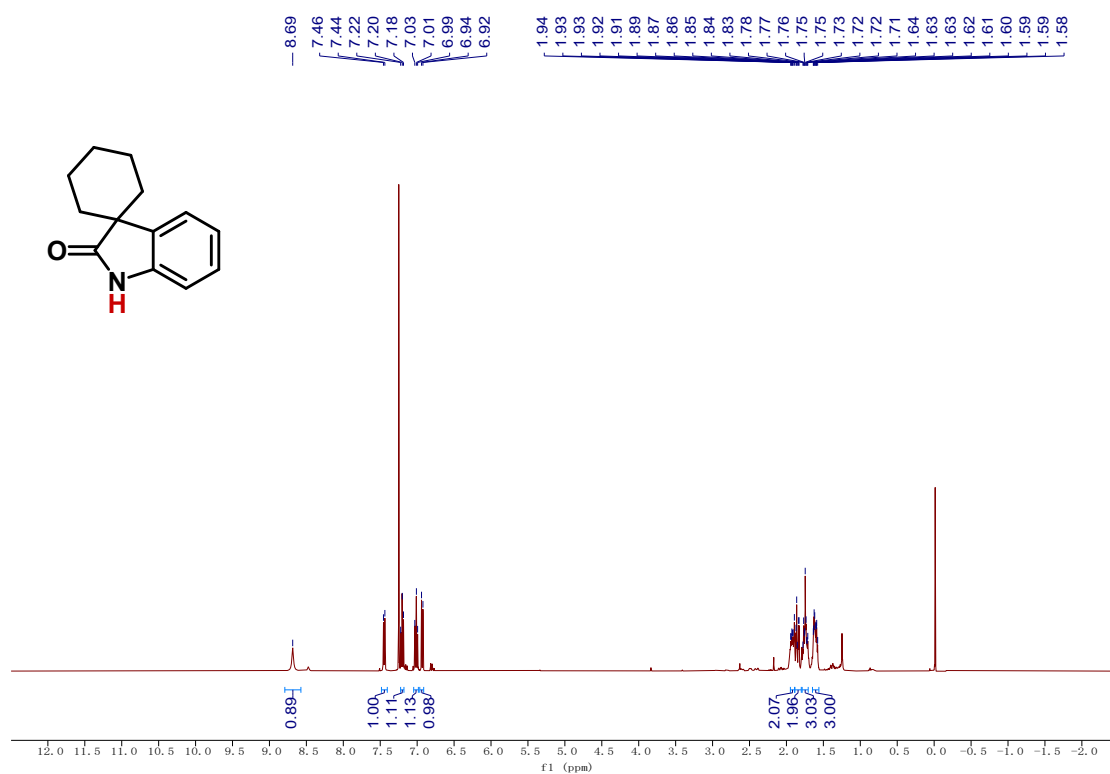

**<sup>13</sup>C NMR of compound 5 (101 MHz in CDCl<sub>3</sub>)**

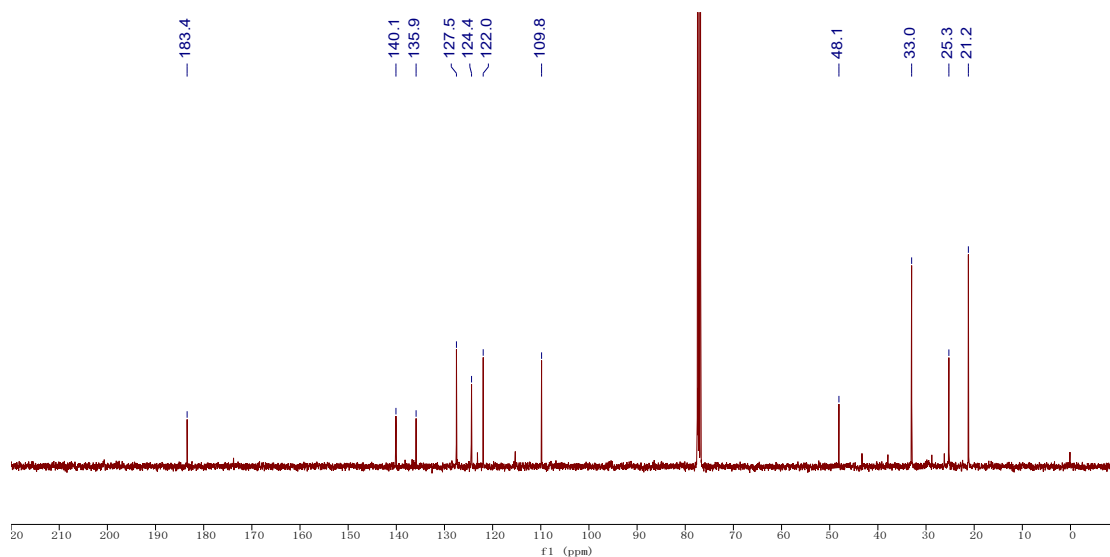

**<sup>1</sup>H NMR of compound 6 (400 MHz in CDCl<sub>3</sub>)**

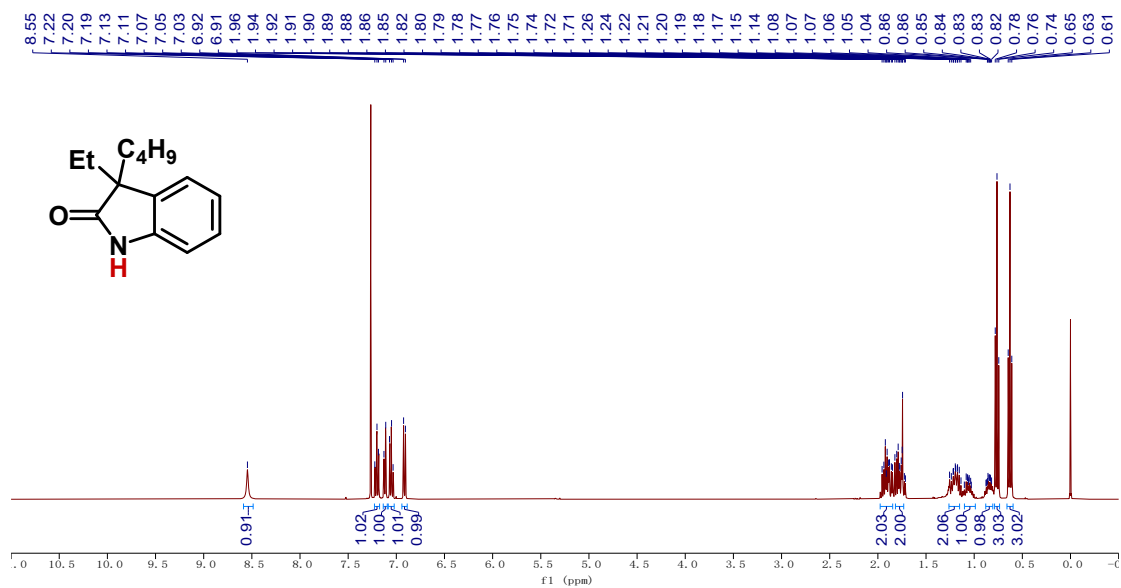

**<sup>13</sup>C NMR of compound 6 (101 MHz in CDCl<sub>3</sub>)**

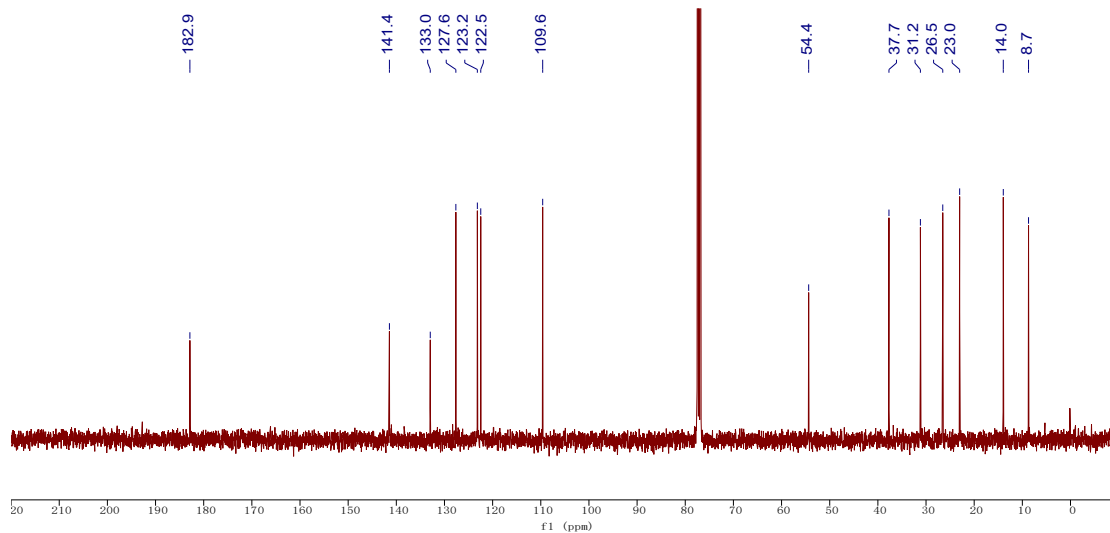

**<sup>1</sup>H NMR of compound 7 (400 MHz in CDCl<sub>3</sub>)**

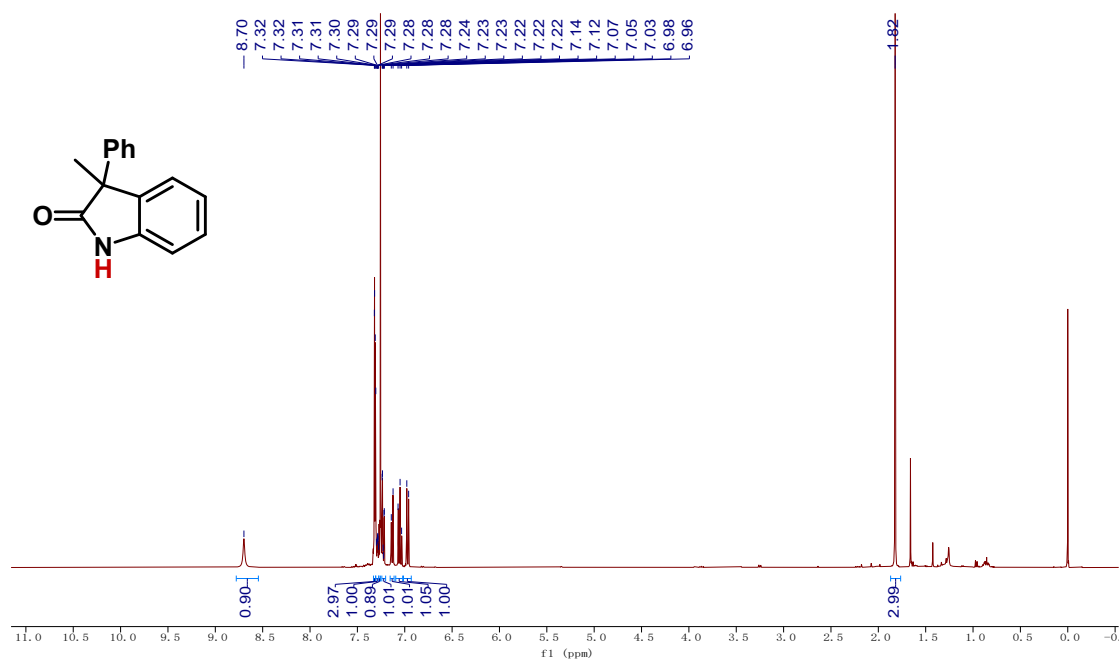

**<sup>13</sup>C NMR of compound 7 (101 MHz in CDCl<sub>3</sub>)**

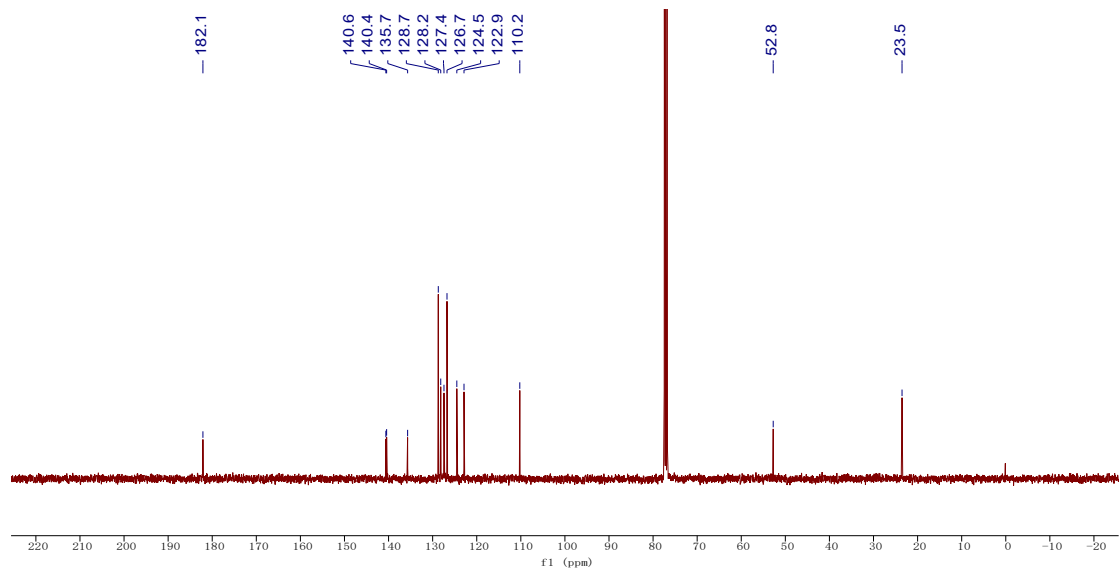

**<sup>1</sup>H NMR of compound 8 (500 MHz in CDCl<sub>3</sub>)**

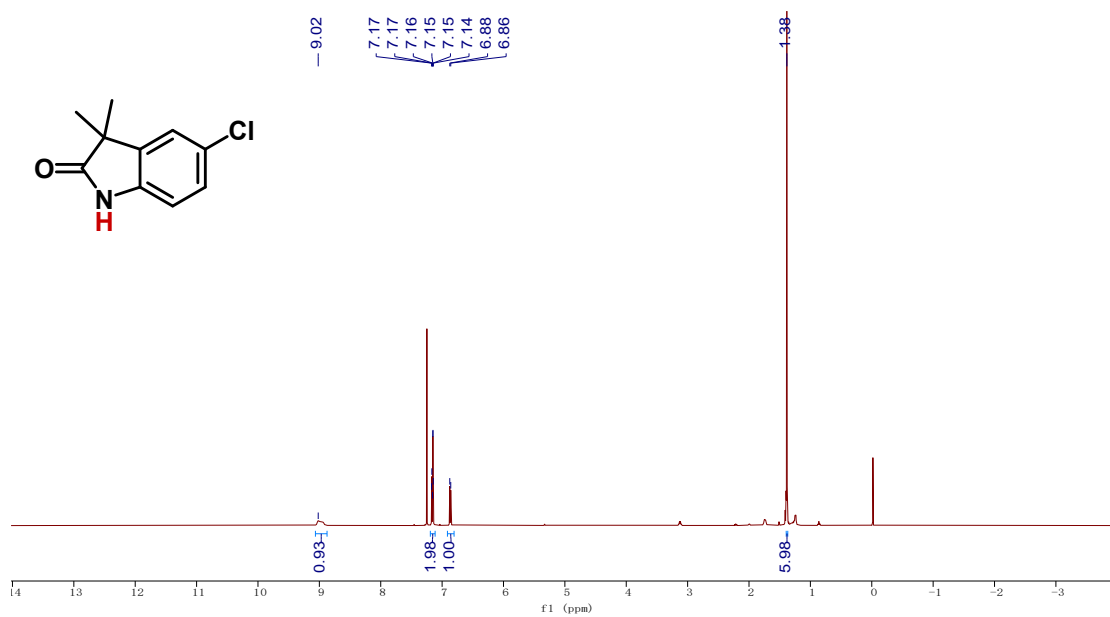

**<sup>13</sup>C NMR of compound 8 (126 MHz in CDCl<sub>3</sub>)**

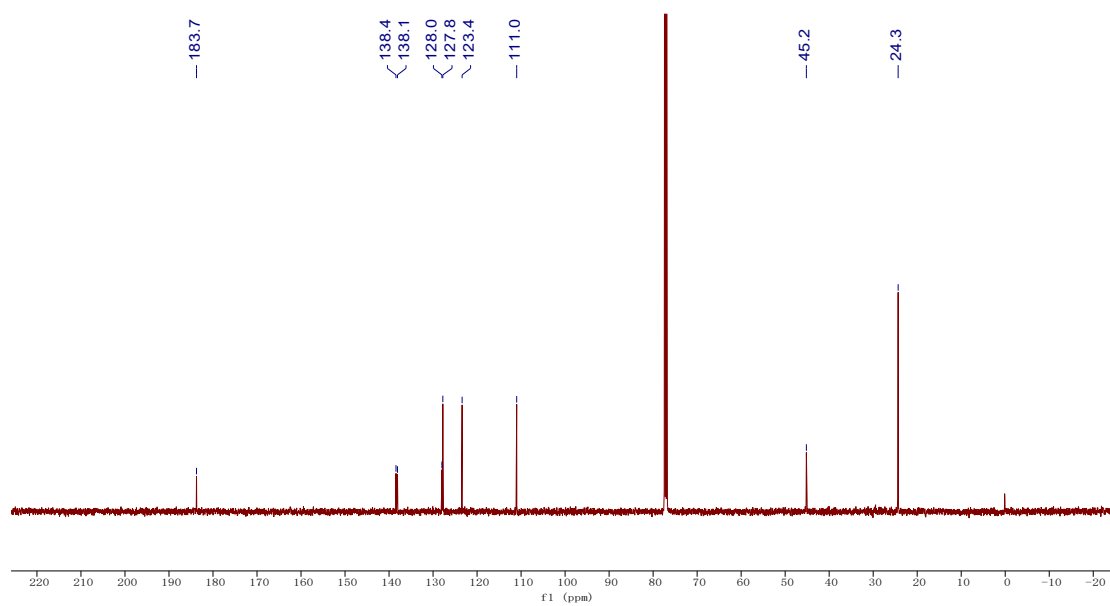

<sup>1</sup>H NMR of compound **9** (500 MHz in CDCl<sub>3</sub>)

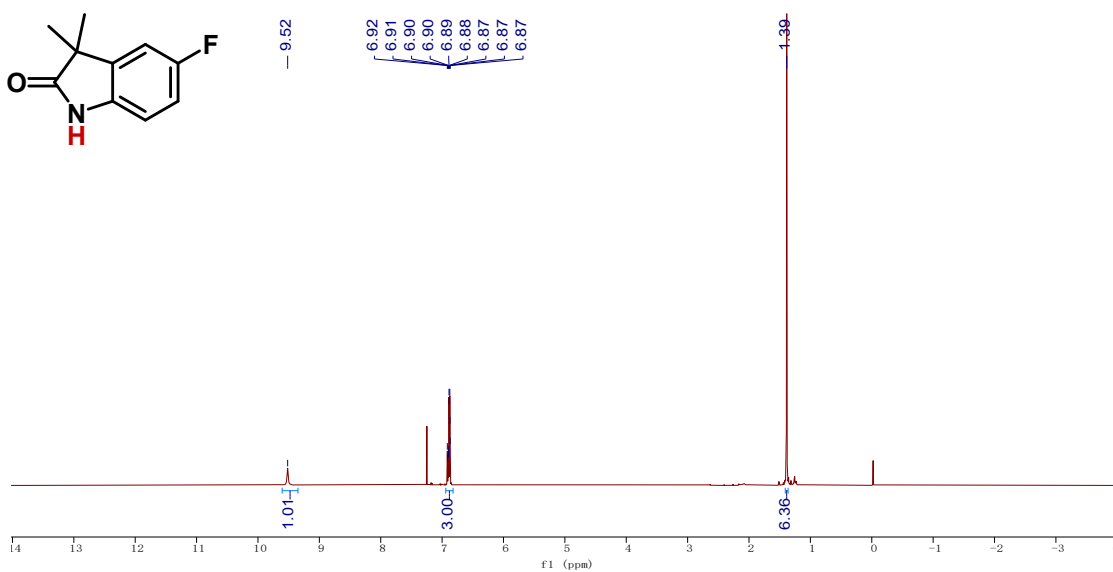

<sup>13</sup>C NMR of compound **9** (126 MHz in CDCl<sub>3</sub>)

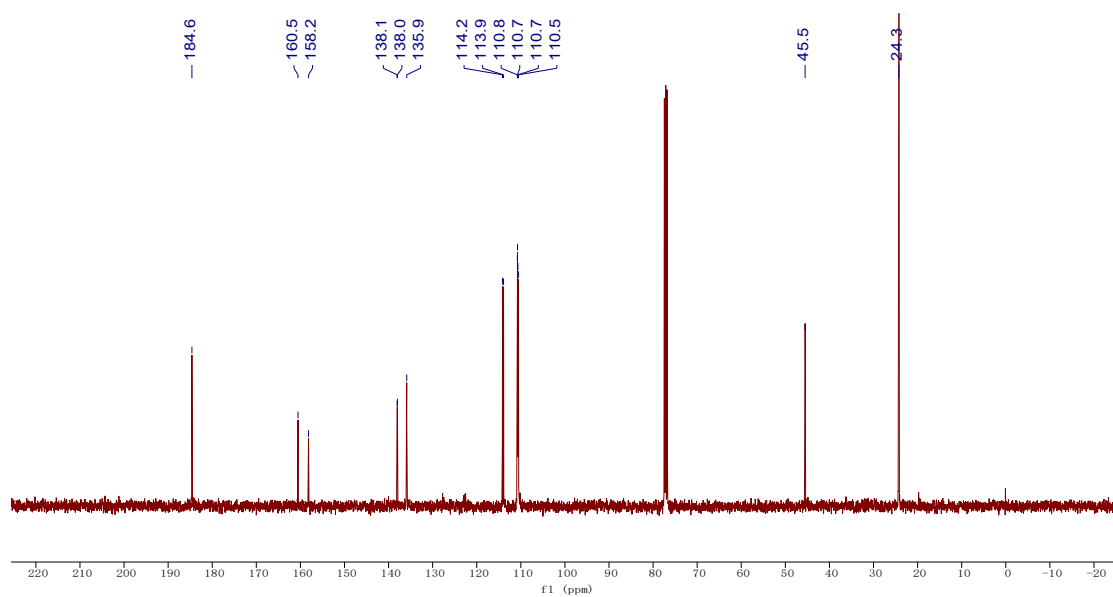



**<sup>19</sup>F NMR** of compound **9** (471 MHz in CDCl<sub>3</sub>)

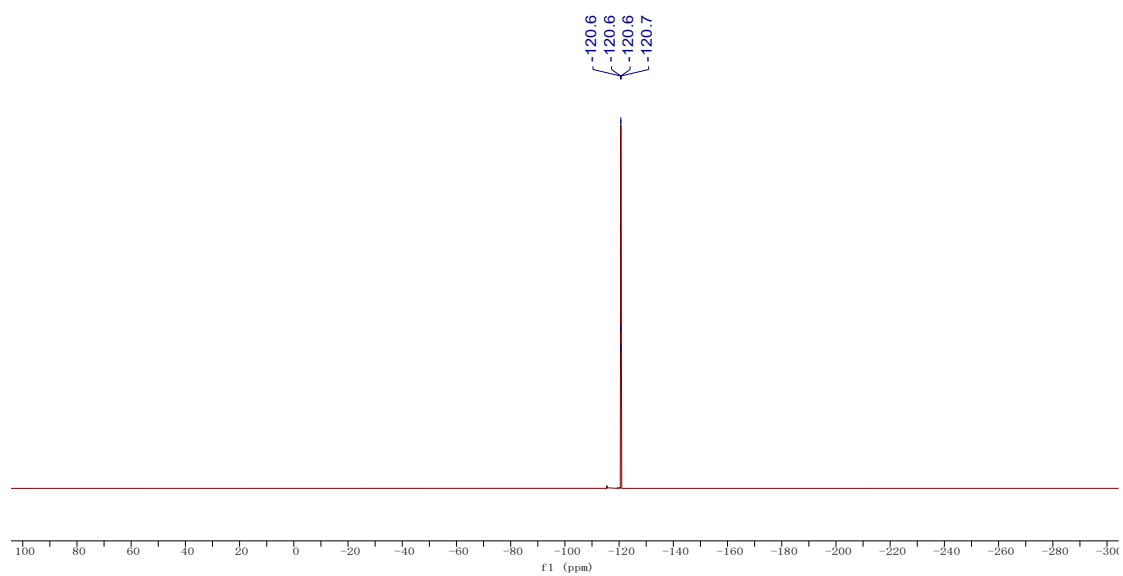

**<sup>1</sup>H NMR of compound 10 (400 MHz in CDCl<sub>3</sub>)**

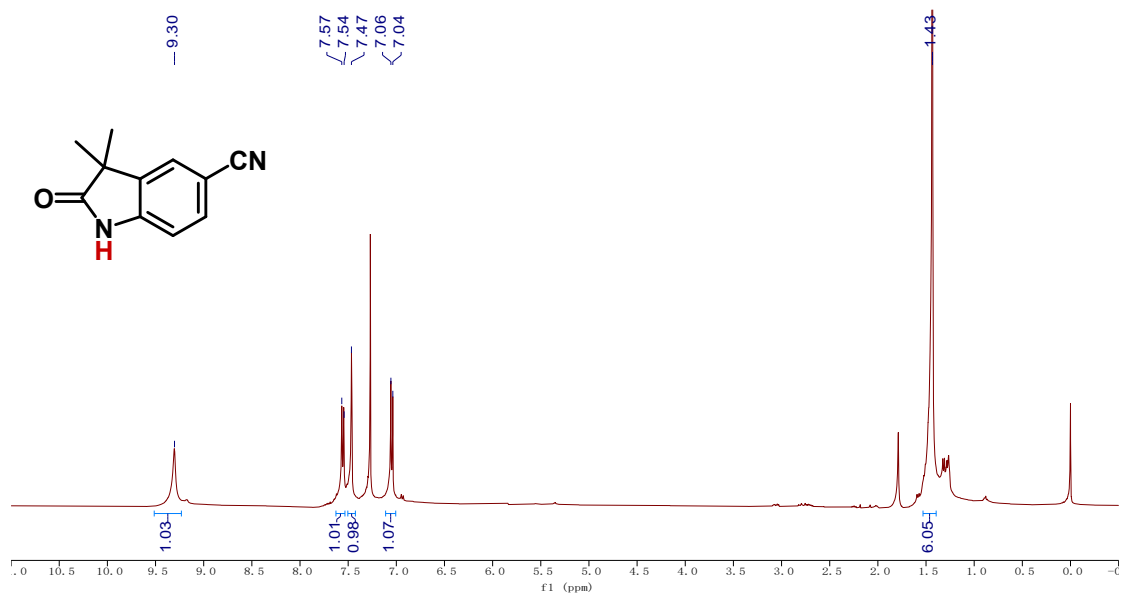

**<sup>13</sup>C NMR of compound 10 (101 MHz in CDCl<sub>3</sub>)**

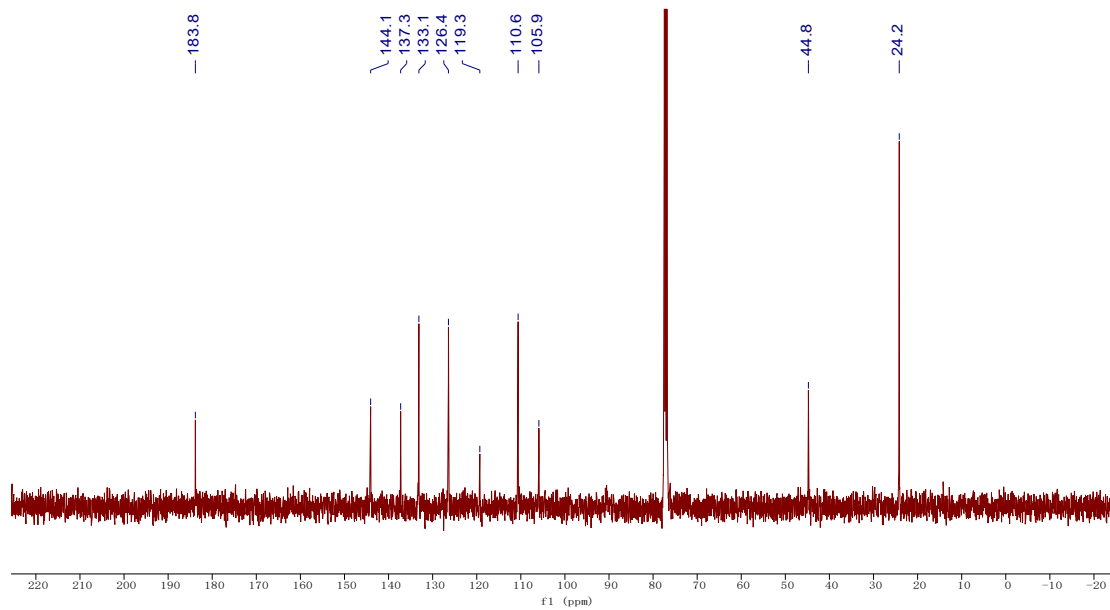

**<sup>1</sup>H NMR of compound 11 (500 MHz in CDCl<sub>3</sub>)**

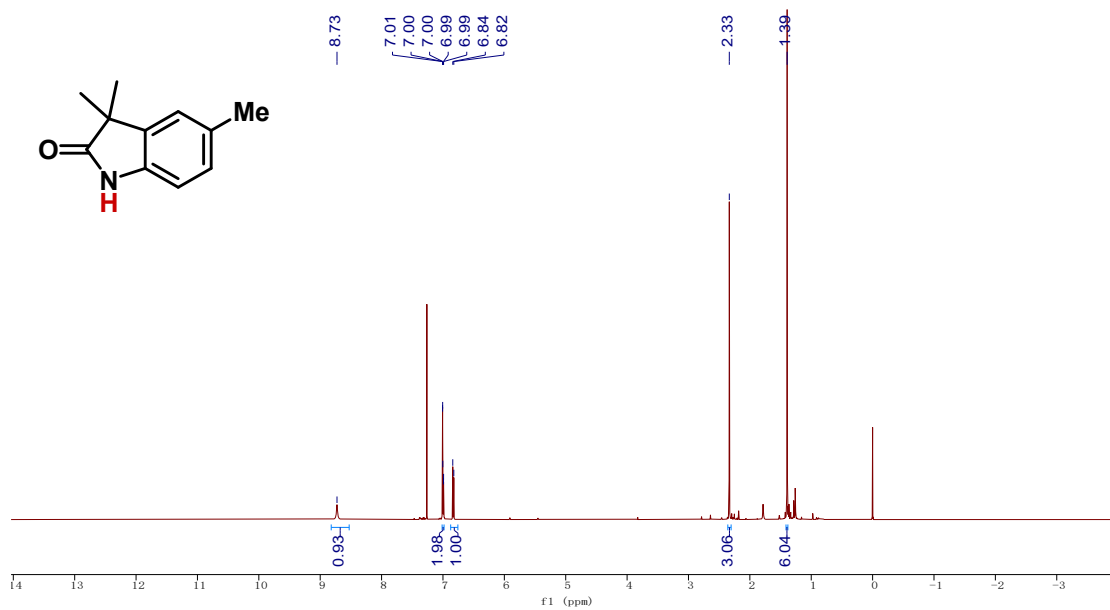

**<sup>13</sup>C NMR of compound 11 (101 MHz in CDCl<sub>3</sub>)**

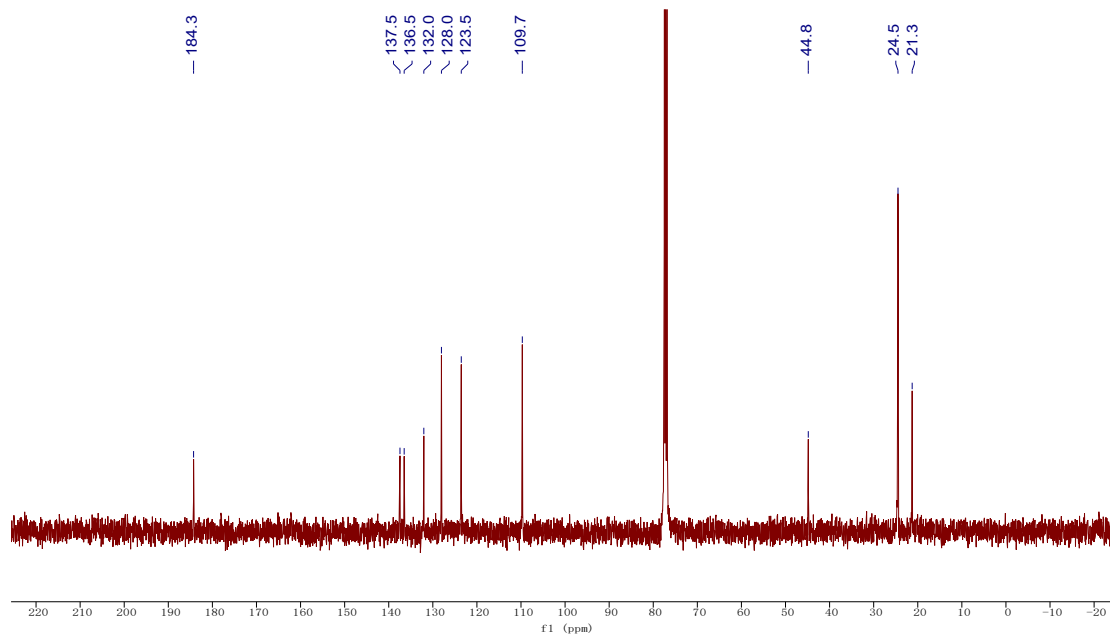

<sup>1</sup>H NMR of compound **12** (400 MHz in CDCl<sub>3</sub>)

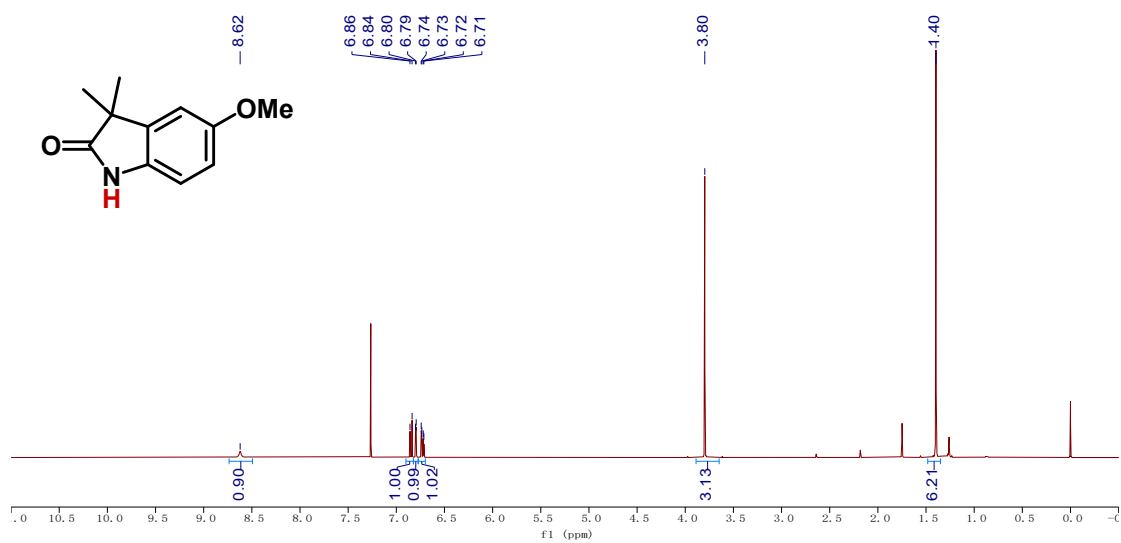

<sup>13</sup>C NMR of compound **12** (101 MHz in CDCl<sub>3</sub>)

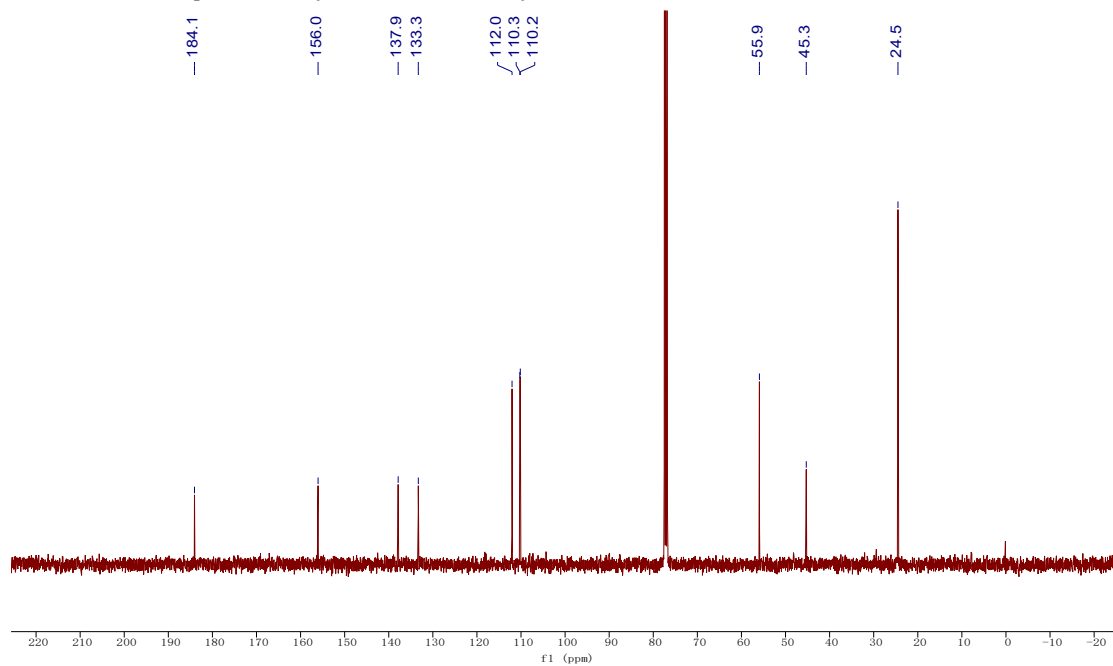

**<sup>1</sup>H NMR of compound 13 (500 MHz in CDCl<sub>3</sub>)**

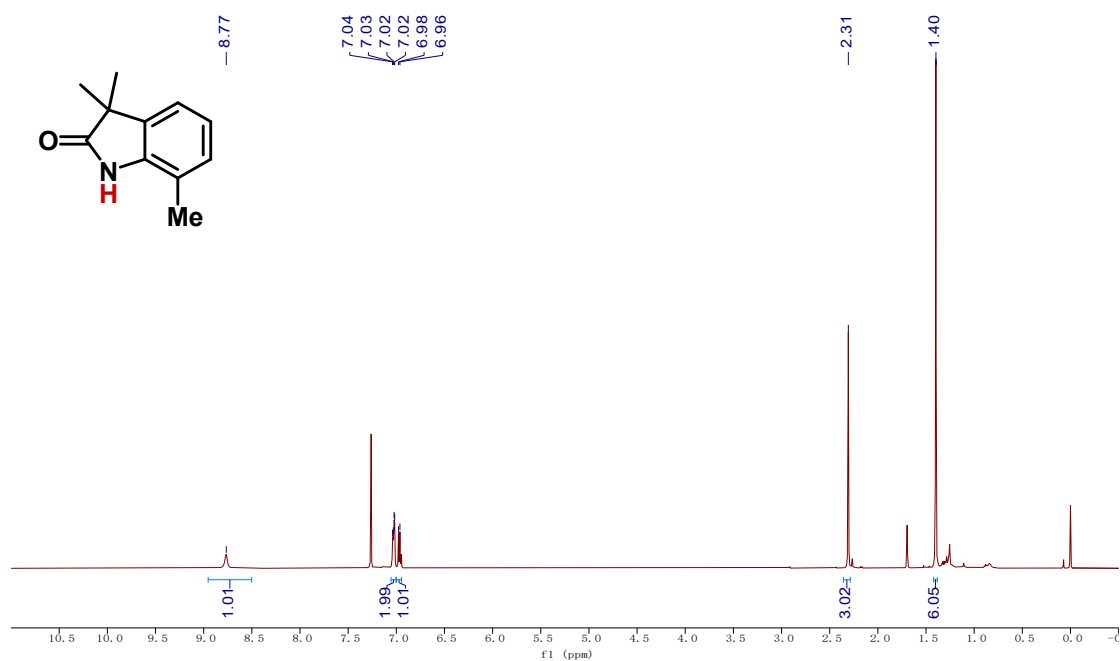

**<sup>13</sup>C NMR of compound 13 (126 MHz in CDCl<sub>3</sub>)**

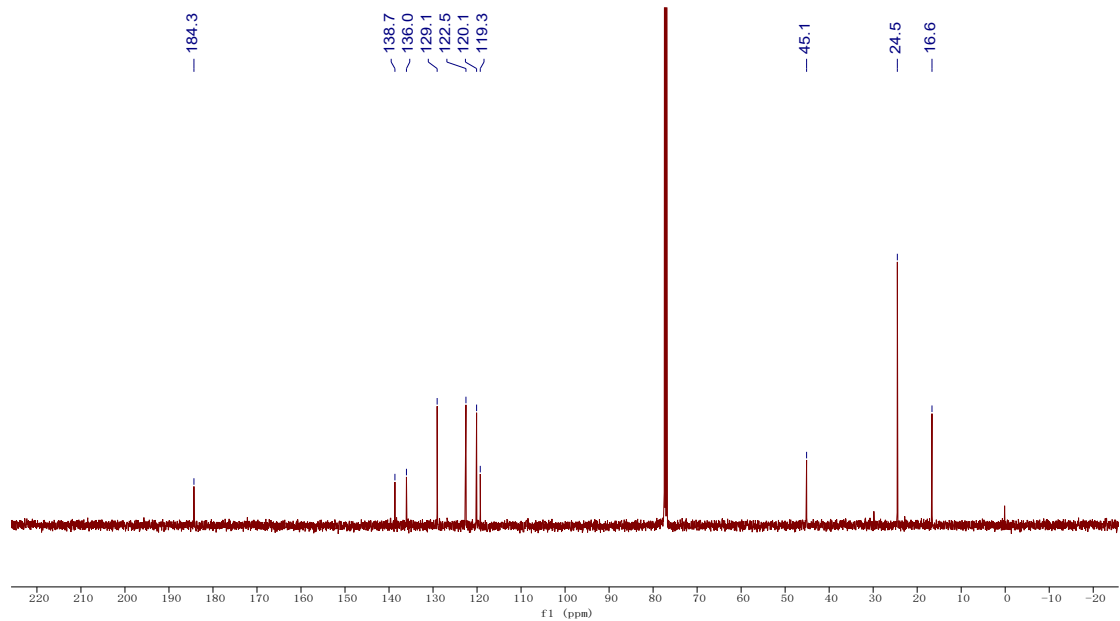

<sup>1</sup>H NMR of compound **14** (400 MHz in CDCl<sub>3</sub>)

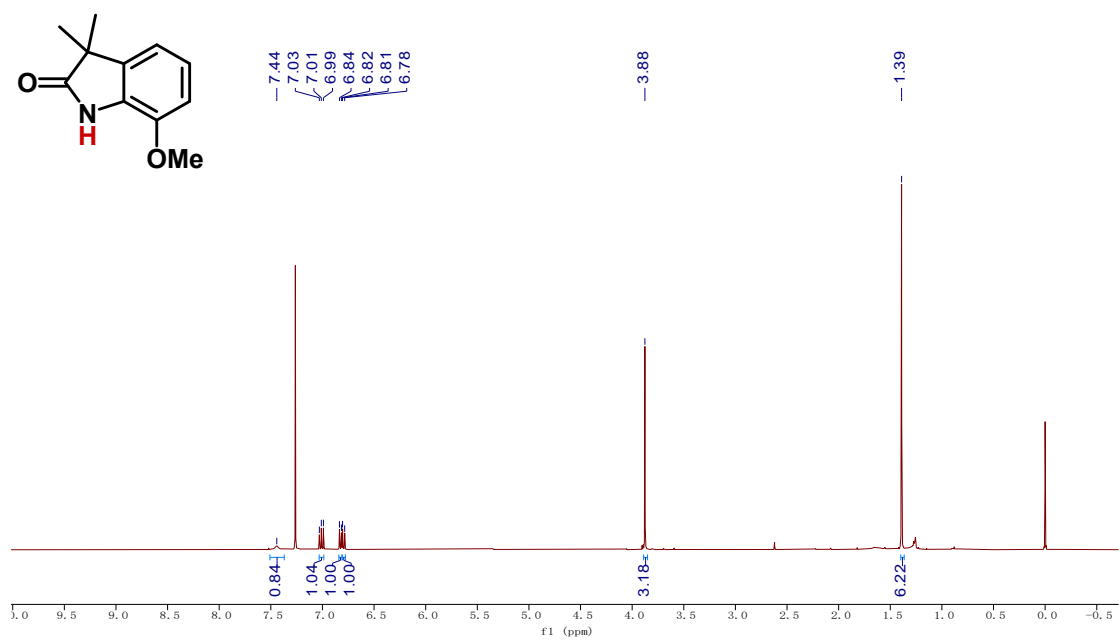

<sup>13</sup>C NMR of compound **14** (126 MHz in CDCl<sub>3</sub>)

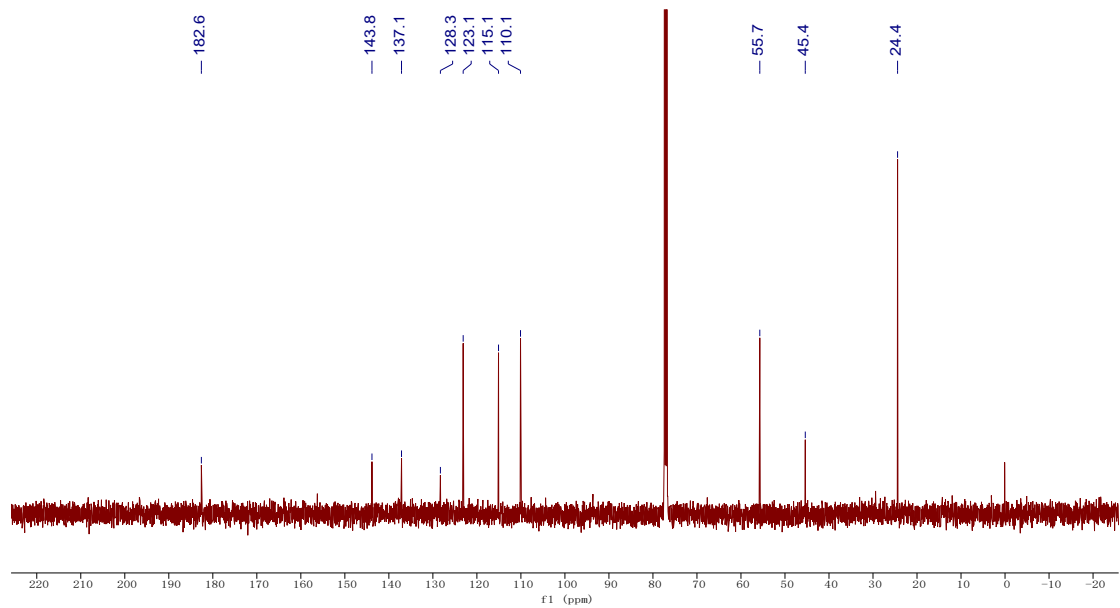

**<sup>1</sup>H NMR of compound 15 (500 MHz in CDCl<sub>3</sub>)**

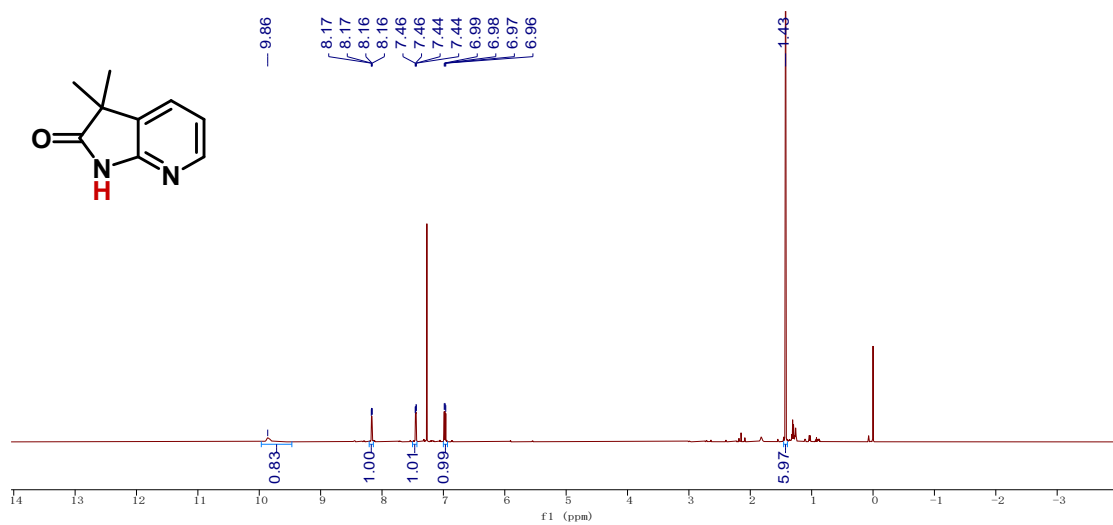

**<sup>13</sup>C NMR of compound 15 (126 MHz in CDCl<sub>3</sub>)**

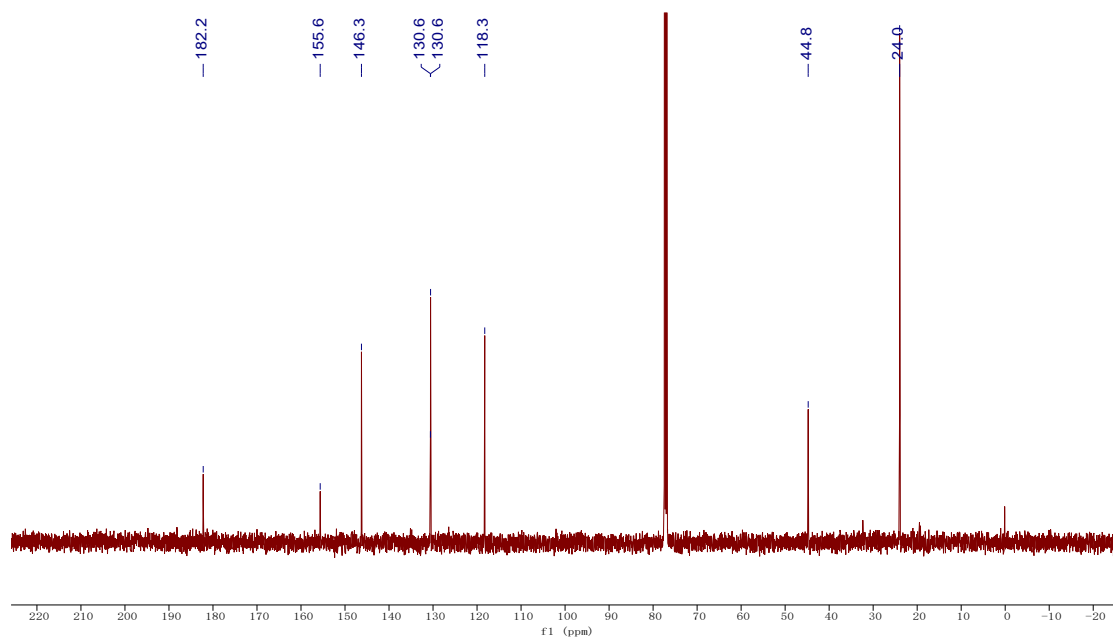

**<sup>1</sup>H NMR of compound 16 (400 MHz in CDCl<sub>3</sub>)**

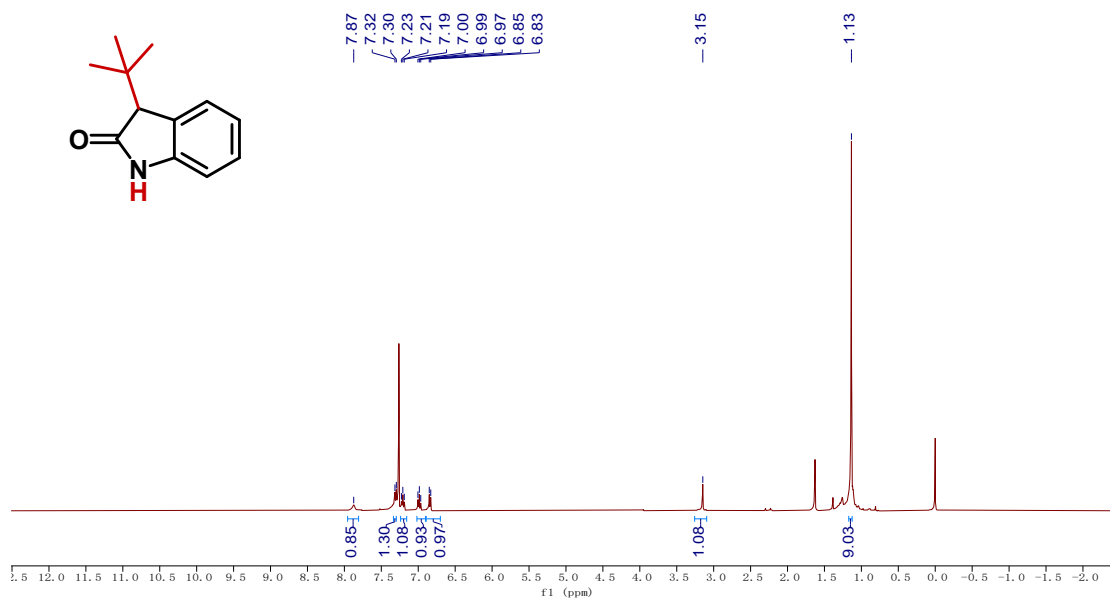

**<sup>13</sup>C NMR of compound 16 (126 MHz in CDCl<sub>3</sub>)**

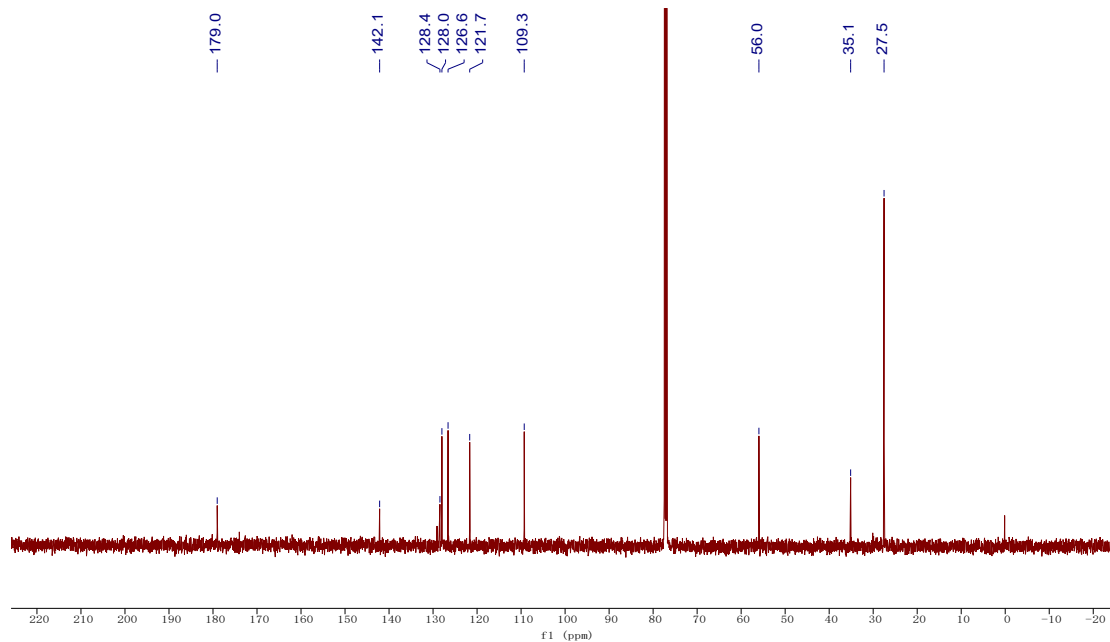



**<sup>1</sup>H NMR of compound 17 (400 MHz in CDCl<sub>3</sub>)**

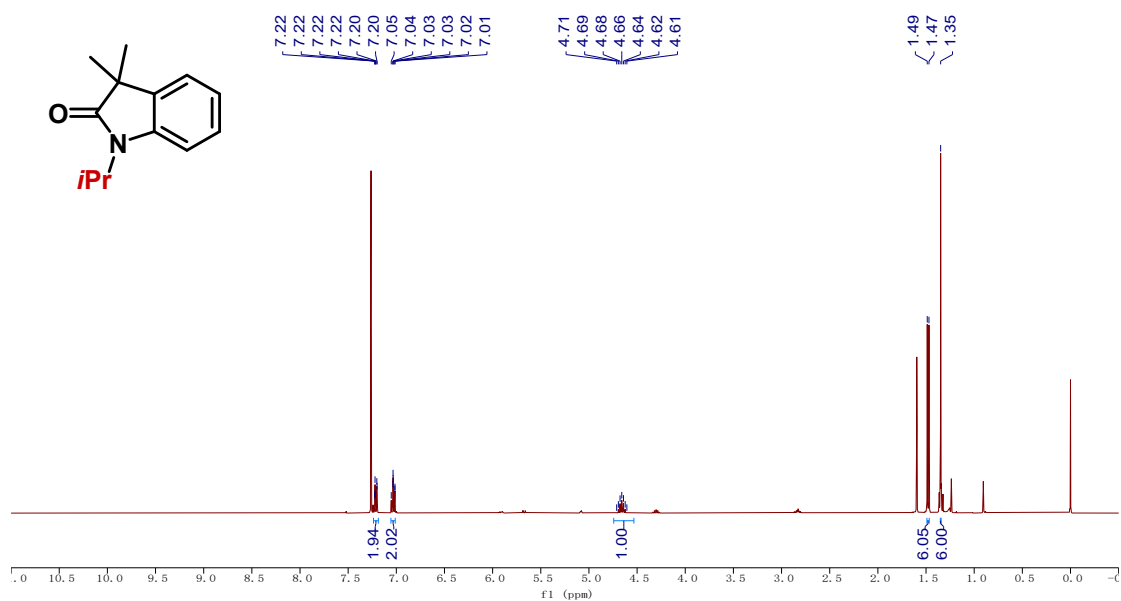

**<sup>13</sup>C NMR of compound 17 (101 MHz in CDCl<sub>3</sub>)**

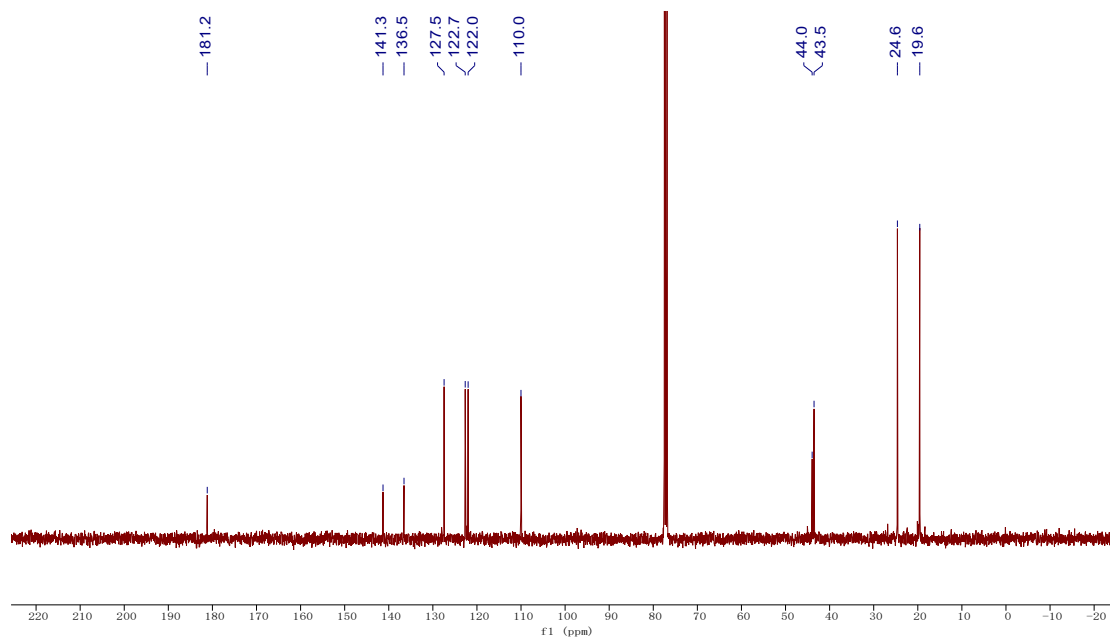

**<sup>1</sup>H NMR of compound 18 (400 MHz in CDCl<sub>3</sub>)**

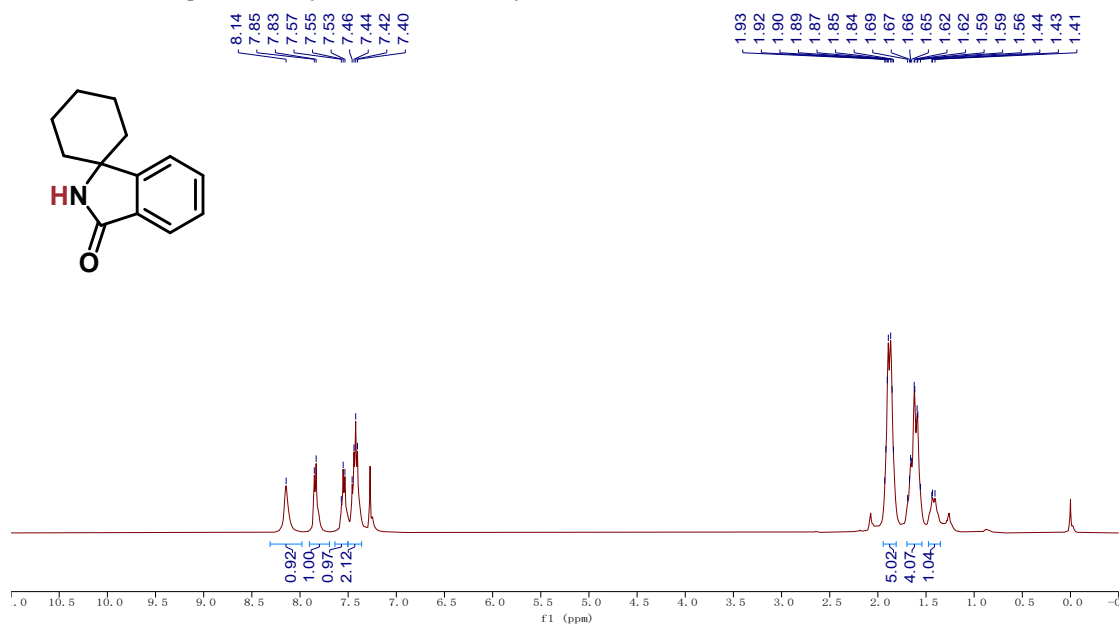

**<sup>13</sup>C NMR of compound 18 (101 MHz in CDCl<sub>3</sub>)**

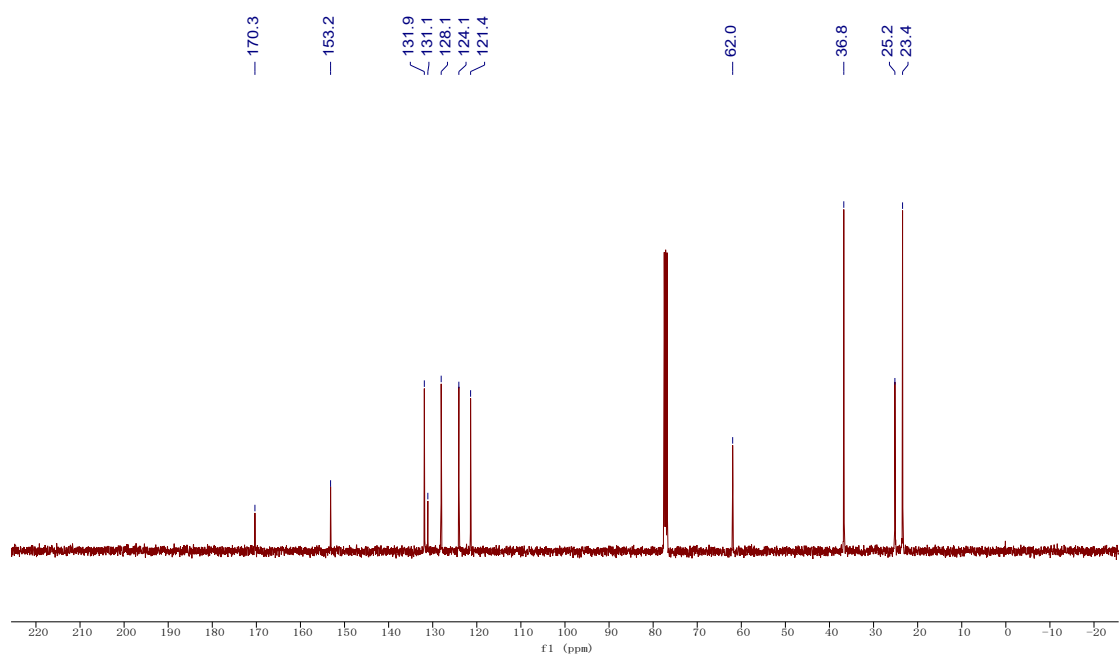

**<sup>1</sup>H NMR of compound 19 (500 MHz in CDCl<sub>3</sub>)**

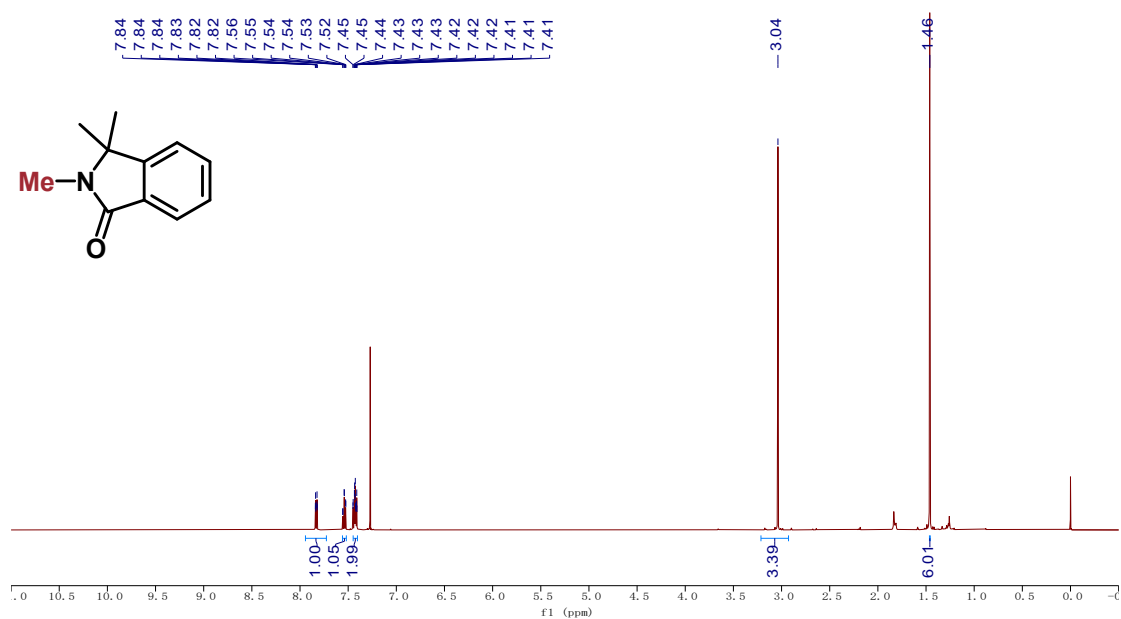

**<sup>13</sup>C NMR of compound 19 (126 MHz in CDCl<sub>3</sub>)**

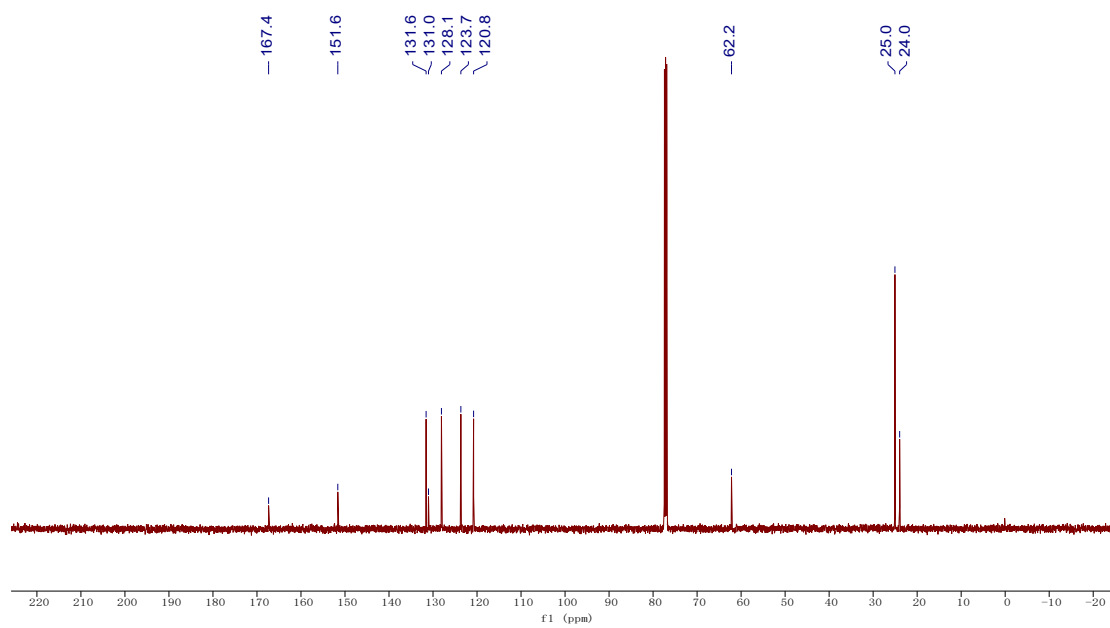

**<sup>1</sup>H NMR of compound 20 (400 MHz in CDCl<sub>3</sub>)**

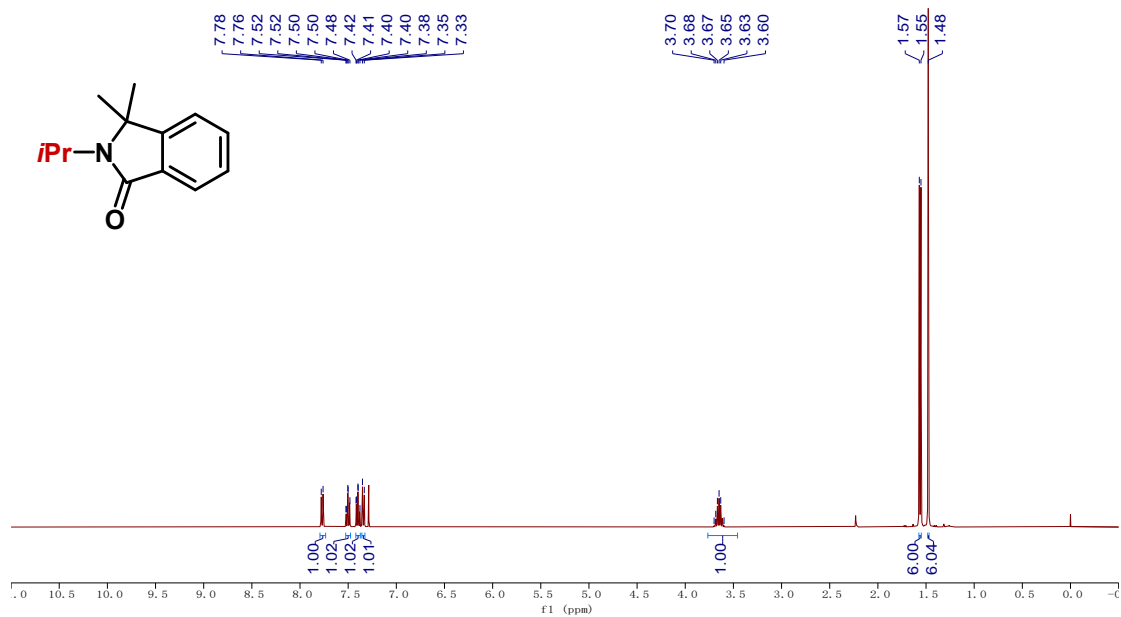

**<sup>13</sup>C NMR of compound 20 (101 MHz in CDCl<sub>3</sub>)**

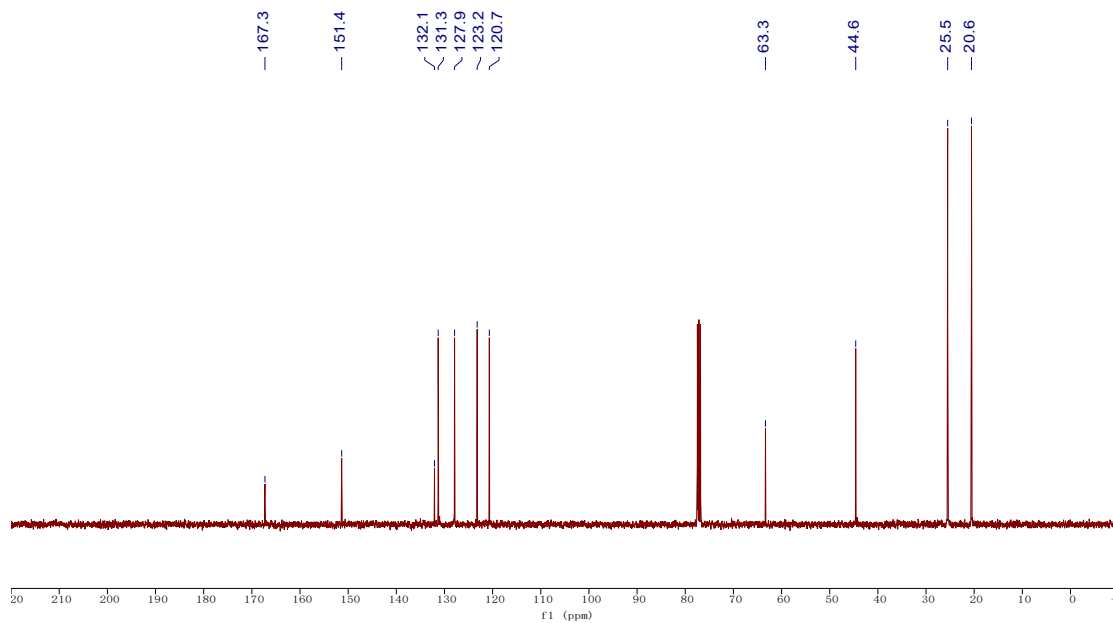

**<sup>1</sup>H NMR of compound 21 (400 MHz in CDCl<sub>3</sub>)**

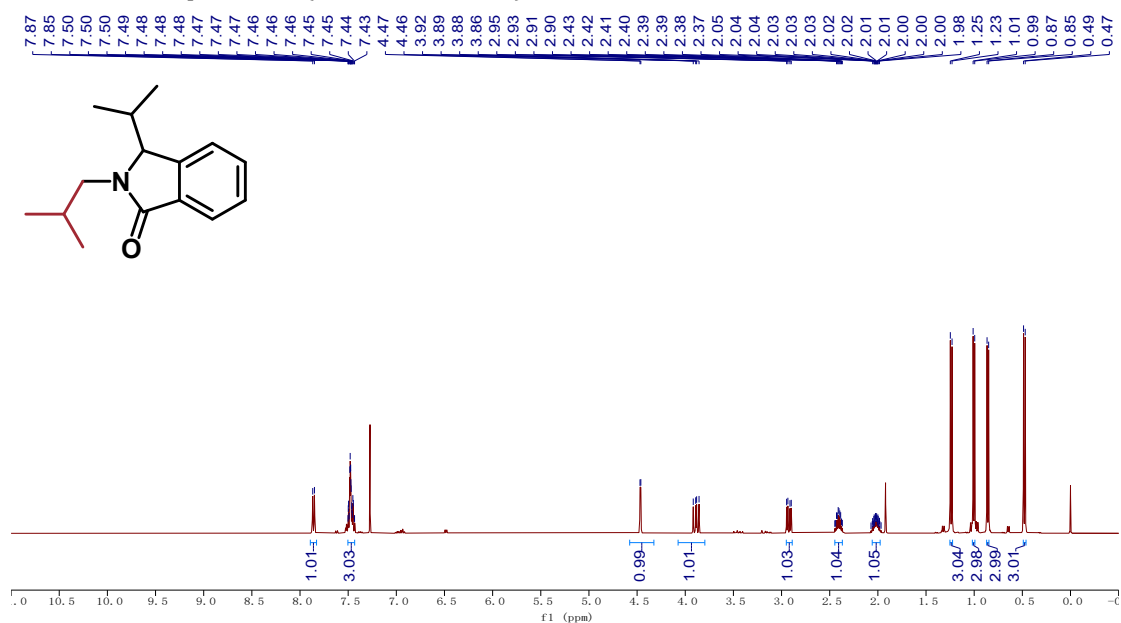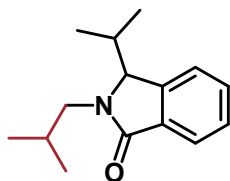

**<sup>13</sup>C NMR of compound 21 (101 MHz in CDCl<sub>3</sub>)**

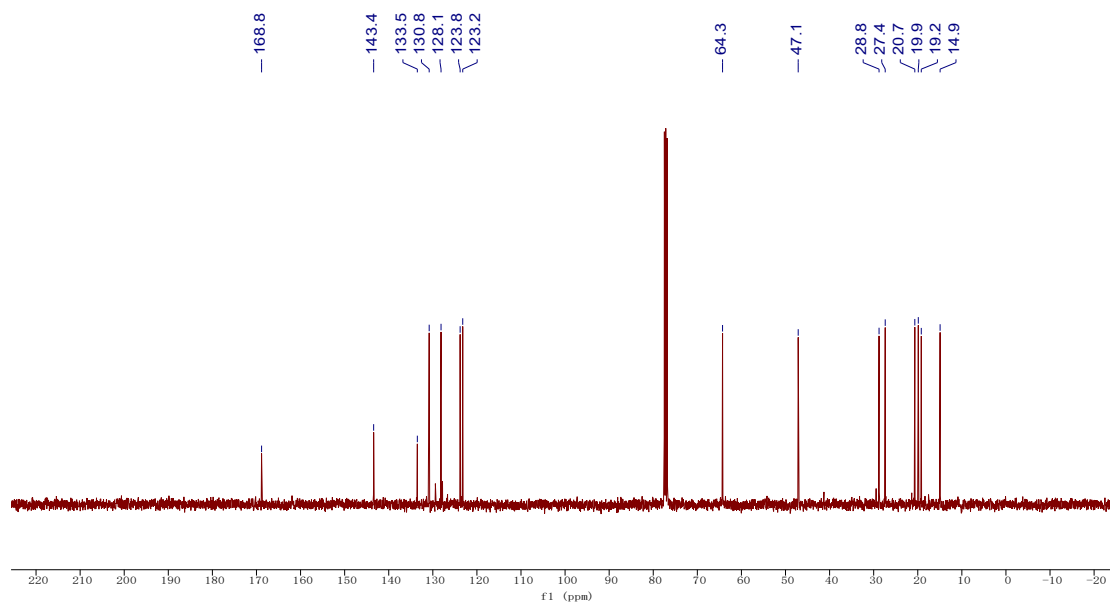

**<sup>1</sup>H NMR of compound 22 (500 MHz in CDCl<sub>3</sub>)**

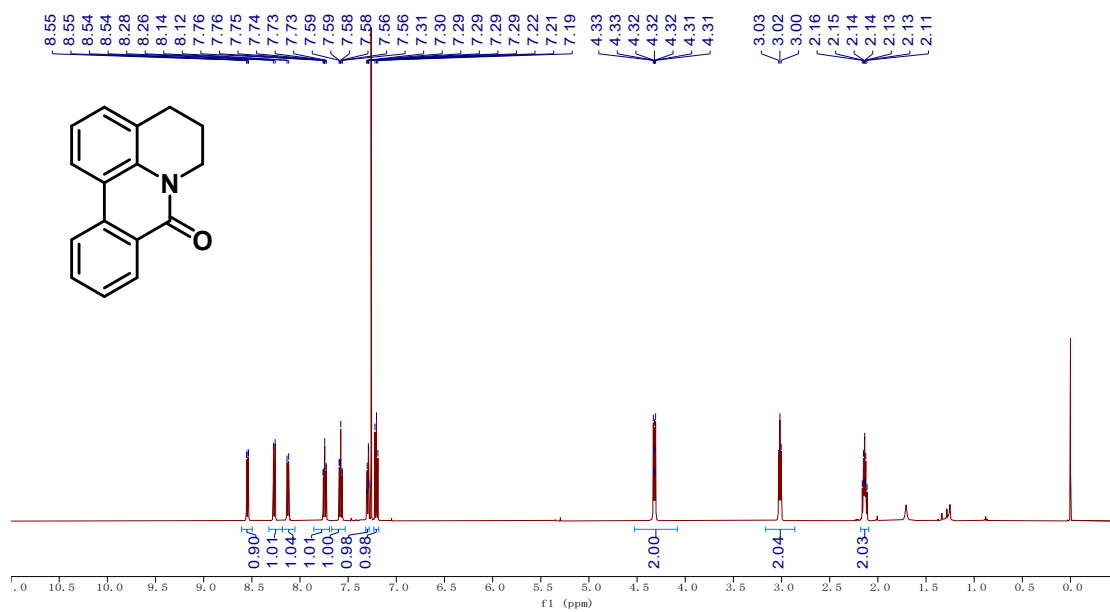

**<sup>13</sup>C NMR of compound 3e (126 MHz in CDCl<sub>3</sub>)**

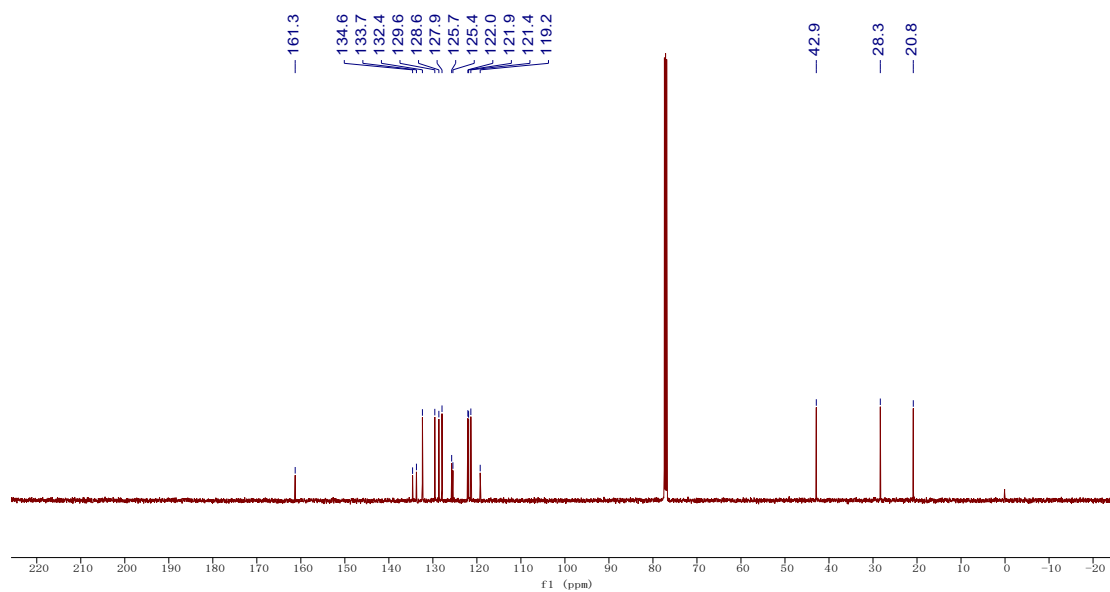

## 7. Computational Details

All calculations were carried out by using Gaussian 16 program.<sup>11</sup> The structures were optimized at B3LYP<sup>12</sup>-D3(BJ)<sup>13</sup>/6-31G(d,p) level in toluene solvent with SMD<sup>14</sup> solvation model. To confirm that the minima have no imaginary frequency and the transition states have unique one imaginary frequency, harmonic frequency analysis calculations were performed at the same level. Using the optimized geometries, the energies were further refined by single-point energy calculations at B3LYP-D3(BJ)/6-311++G(d,p) level with SMD solvation model. A correction factor of 1.89 kcal/mol was employed for the standard state change from 1 atm to 1 M. The vertical excitation energies were calculated at TD<sup>15</sup>-B3LYP-D3(BJ)/6-311++G(d,p) level with the optimized geometries in the ground state. Selected structures were illustrated by using the CYLview<sup>16</sup> visualization software.

### Cartesian Coordinates in Å, SCF Energies and Free Energies (in a.u.) at 298.15 K for the Optimized Structures [BSI=6-31G(d,p), BSII=6-311++G(d,p)]

| PhCH <sub>3</sub>                       |           |           |           | tBuOK                                   |           |           |           |
|-----------------------------------------|-----------|-----------|-----------|-----------------------------------------|-----------|-----------|-----------|
| B3LYP-D3BJ/BSI SCF energy in toluene:   |           |           |           | B3LYP-D3BJ/BSI SCF energy in toluene:   |           |           |           |
| -271.605318 a.u.                        |           |           |           | -833.022658 a.u.                        |           |           |           |
| B3LYP-D3BJ/BSII SCF energy in toluene:  |           |           |           | B3LYP-D3BJ/BSII SCF energy in toluene:  |           |           |           |
| -271.671546 a.u.                        |           |           |           | -833.142665 a.u.                        |           |           |           |
| B3LYP-D3BJ/BSII free energy in toluene: |           |           |           | B3LYP-D3BJ/BSII free energy in toluene: |           |           |           |
| -271.570993 a.u.                        |           |           |           | -833.050769 a.u.                        |           |           |           |
| C                                       | -1.200535 | 1.205388  | 0.002262  | C                                       | 1.617211  | -1.437286 | 0.211126  |
| C                                       | 0.194797  | 1.202908  | -0.009144 | C                                       | 1.074103  | 0.000016  | 0.000164  |
| C                                       | 0.913785  | 0.000301  | -0.012267 | H                                       | 1.245286  | -1.832654 | 1.164344  |
| C                                       | 0.195165  | -1.202688 | -0.009145 | H                                       | 1.244234  | -2.090059 | -0.587627 |
| C                                       | -1.200032 | -1.205665 | 0.002261  | H                                       | 2.714376  | -1.497915 | 0.219259  |
| C                                       | -1.903915 | -0.000213 | 0.008445  | C                                       | 1.615472  | 0.534423  | -1.351219 |
| H                                       | -1.738408 | 2.149281  | 0.002119  | C                                       | 1.621072  | 0.901740  | 1.137164  |
| H                                       | 0.735745  | 2.145928  | -0.017207 | H                                       | 1.241615  | 1.552119  | -1.517851 |
| H                                       | 0.736491  | -2.145511 | -0.017223 | H                                       | 2.712581  | 0.557932  | -1.409243 |
| H                                       | -1.737629 | -2.149716 | 0.002117  | H                                       | 1.242755  | -0.094451 | -2.169025 |
| H                                       | -2.989964 | -0.000449 | 0.014041  | H                                       | 2.718406  | 0.938114  | 1.182683  |
| C                                       | 2.422349  | 0.000120  | 0.009371  | H                                       | 1.249949  | 1.925201  | 1.003288  |
| H                                       | 2.802687  | -0.013031 | 1.038908  | H                                       | 1.250343  | 0.537840  | 2.103228  |
| H                                       | 2.830718  | -0.879567 | -0.497825 | O                                       | -0.292385 | 0.001035  | 0.002621  |
| H                                       | 2.830676  | 0.892162  | -0.475627 | K                                       | -2.570927 | 0.000118  | 0.000346  |

**IM1**

B3LYP-D3BJ/BSI SCF energy in toluene:

-1104.651761 a.u.

B3LYP-D3BJ/BSII SCF energy in toluene:

-1104.828735 a.u.

B3LYP-D3BJ/BSII free energy in toluene:

-1104.620562 a.u.

|   |           |           |           |
|---|-----------|-----------|-----------|
| C | -3.232132 | 0.178018  | 1.276075  |
| C | -2.189388 | -0.751528 | 1.211225  |
| C | -1.711453 | -1.224853 | -0.024116 |
| C | -2.328615 | -0.748122 | -1.194361 |
| C | -3.372113 | 0.181609  | -1.135665 |
| C | -3.823577 | 0.656241  | 0.101023  |
| H | -3.584110 | 0.526734  | 2.243023  |
| H | -1.729164 | -1.111380 | 2.127772  |
| H | -1.978672 | -1.106186 | -2.159160 |
| H | -3.834156 | 0.532240  | -2.054415 |
| H | -4.636341 | 1.374810  | 0.149180  |
| C | -0.498280 | -2.110727 | -0.093700 |
| H | -0.430681 | -2.767966 | 0.778812  |
| H | -0.502966 | -2.728644 | -0.996888 |
| H | 0.399467  | -1.463719 | -0.112888 |
| C | 3.380746  | -0.841647 | -1.217983 |
| C | 2.937804  | -0.014151 | 0.015200  |
| H | 2.793982  | -1.765934 | -1.276108 |
| H | 3.186931  | -0.267498 | -2.132043 |
| H | 4.445036  | -1.114102 | -1.202667 |
| C | 3.812533  | 1.264352  | 0.083295  |
| C | 3.201914  | -0.852344 | 1.291970  |
| H | 3.519295  | 1.863129  | 0.954911  |
| H | 4.889353  | 1.059036  | 0.158131  |
| H | 3.643867  | 1.872460  | -0.814297 |
| H | 4.258196  | -1.122877 | 1.427003  |
| H | 2.877688  | -0.286536 | 2.173969  |
| H | 2.615886  | -1.778276 | 1.257916  |
| O | 1.610351  | 0.317460  | -0.077578 |
| K | -0.309529 | 1.648628  | -0.093653 |

**TS1**

B3LYP-D3BJ/BSI SCF energy in toluene:

-1104.632431 a.u.

B3LYP-D3BJ/BSII SCF energy in toluene:

-1104.805562 a.u.

B3LYP-D3BJ/BSII free energy in toluene:

-1104.599295 a.u.

|   |           |           |           |
|---|-----------|-----------|-----------|
| C | 3.075160  | 0.037056  | -1.204915 |
| C | 1.996406  | -0.844705 | -1.206575 |
| C | 1.391911  | -1.309080 | 0.000138  |
| C | 1.996968  | -0.844637 | 1.206543  |
| C | 3.075728  | 0.037120  | 1.204326  |
| C | 3.621360  | 0.512110  | -0.000435 |
| H | 3.499677  | 0.359506  | -2.153271 |
| H | 1.586933  | -1.186491 | -2.154427 |
| H | 1.587948  | -1.186375 | 2.154608  |
| H | 3.500706  | 0.359602  | 2.152465  |
| H | 4.470243  | 1.188554  | -0.000651 |
| C | 0.140205  | -2.030196 | 0.000446  |
| H | -0.049006 | -2.612902 | 0.906027  |
| H | -0.800037 | -0.892897 | 0.000526  |
| H | -0.049395 | -2.613019 | -0.904980 |
| C | -3.216162 | -0.731353 | 1.260390  |
| C | -2.760091 | 0.025514  | -0.000067 |
| H | -2.789032 | -1.739072 | 1.273356  |
| H | -2.868671 | -0.207602 | 2.157896  |
| H | -4.307617 | -0.821947 | 1.314302  |
| C | -3.358054 | 1.440280  | 0.000006  |
| C | -3.215298 | -0.730851 | -1.261142 |
| H | -3.027730 | 1.990839  | -0.889095 |
| H | -4.454344 | 1.424293  | -0.000548 |
| H | -3.028602 | 1.990397  | 0.889699  |
| H | -4.306742 | -0.820909 | -1.316150 |
| H | -2.866659 | -0.207044 | -2.158169 |
| H | -2.788636 | -1.738774 | -1.273950 |
| O | -1.356829 | 0.154207  | 0.000446  |
| K | 0.581936  | 1.690139  | 0.000343  |

**17-S**

B3LYP-D3BJ/BSI SCF energy in toluene:

-1096.513931 a.u.

B3LYP-D3BJ/BSII SCF energy in toluene:

-1096.705402 a.u.



B3LYP-D3BJ/BSII free energy in toluene:

-1096.460219 a.u.

|    |           |           |           |
|----|-----------|-----------|-----------|
| C  | 2.745381  | 0.330156  | -1.815252 |
| C  | 1.379643  | 0.514693  | -1.610664 |
| C  | 0.806472  | 0.338983  | -0.345595 |
| C  | 1.650016  | -0.024267 | 0.717001  |
| C  | 3.015941  | -0.222046 | 0.522530  |
| C  | 3.562599  | -0.040787 | -0.747299 |
| H  | 3.167147  | 0.469574  | -2.805347 |
| H  | 0.729311  | 0.796345  | -2.431965 |
| H  | 3.639972  | -0.510472 | 1.360794  |
| H  | 4.626912  | -0.192040 | -0.896572 |
| Cl | 0.980623  | -0.267739 | 2.321187  |
| N  | -0.584309 | 0.583356  | -0.155429 |
| C  | -1.516906 | -0.429505 | -0.101882 |
| O  | -2.713550 | -0.194556 | 0.053940  |
| C  | -1.025591 | -1.864066 | -0.317068 |
| H  | 0.033610  | -1.940749 | -0.062330 |
| C  | -1.821288 | -2.824081 | 0.569998  |
| H  | -2.890338 | -2.741104 | 0.359530  |
| H  | -1.505643 | -3.856828 | 0.389980  |
| H  | -1.669097 | -2.601442 | 1.630725  |
| C  | -1.188084 | -2.207007 | -1.808446 |
| H  | -0.580860 | -1.551428 | -2.440650 |
| H  | -0.878415 | -3.239802 | -1.997955 |
| H  | -2.234548 | -2.101369 | -2.111915 |
| C  | -1.002329 | 2.014314  | -0.069721 |
| C  | -1.640781 | 2.342934  | 1.282323  |
| C  | -1.887631 | 2.414331  | -1.252829 |
| H  | -0.064052 | 2.571344  | -0.143434 |
| H  | -0.972810 | 2.068363  | 2.102988  |
| H  | -1.834130 | 3.419339  | 1.342929  |
| H  | -2.583686 | 1.808827  | 1.403627  |
| H  | -1.390089 | 2.202171  | -2.204764 |
| H  | -2.834358 | 1.873214  | -1.225307 |
| H  | -2.095612 | 3.488671  | -1.212604 |

### IM2 (I)

B3LYP-D3BJ/BSI SCF energy in toluene:

-2201.175146 a.u.

B3LYP-D3BJ/BSII SCF energy in toluene:

-2201.535067 a.u.

B3LYP-D3BJ/BSII free energy in toluene:

-2201.063805 a.u.

|   |           |           |           |
|---|-----------|-----------|-----------|
| C | -4.442992 | 2.101493  | -0.417370 |
| C | -3.563319 | 2.699526  | 0.469560  |
| C | -2.152579 | 2.851061  | 0.181841  |
| C | -1.762232 | 2.377826  | -1.128785 |
| C | -2.654439 | 1.775491  | -1.996205 |
| C | -4.014029 | 1.589464  | -1.659737 |
| H | -5.492393 | 2.017126  | -0.138856 |
| H | -3.937413 | 3.078132  | 1.420156  |
| H | -0.721895 | 2.491789  | -1.425371 |
| H | -2.292582 | 1.430917  | -2.963761 |
| H | -4.719663 | 1.176266  | -2.373435 |
| C | -1.231773 | 3.315551  | 1.129126  |
| H | -0.217311 | 3.557132  | 0.819824  |
| H | -3.482402 | -0.160058 | -0.642472 |
| H | -1.591312 | 3.824531  | 2.022026  |
| C | -3.525779 | -2.609869 | -1.625680 |
| C | -3.869800 | -2.070984 | -0.232561 |
| H | -3.799913 | -1.881133 | -2.396018 |
| H | -2.452317 | -2.802851 | -1.706018 |
| H | -4.062368 | -3.541667 | -1.833703 |
| C | -3.378791 | -3.023976 | 0.856511  |
| C | -5.374601 | -1.813205 | -0.101802 |
| H | -3.633323 | -2.636810 | 1.849679  |
| H | -3.838528 | -4.011299 | 0.750102  |
| H | -2.292015 | -3.141142 | 0.797803  |
| H | -5.946954 | -2.739284 | -0.219923 |
| H | -5.604272 | -1.386590 | 0.879826  |
| H | -5.712265 | -1.105955 | -0.866469 |
| O | -3.158321 | -0.842460 | -0.012532 |
| K | -1.665104 | 0.394545  | 1.705943  |
| C | 5.667550  | -0.830801 | -1.176944 |
| C | 4.430860  | -1.302032 | -0.741263 |
| C | 3.348341  | -0.432264 | -0.576123 |
| C | 3.533089  | 0.930066  | -0.863709 |
| C | 4.769675  | 1.412095  | -1.289620 |
| C | 5.835505  | 0.527226  | -1.448927 |
| H | 6.496254  | -1.520775 | -1.297571 |
| H | 4.283530  | -2.354106 | -0.520446 |
| H | 4.888873  | 2.469591  | -1.496596 |
| H | 6.795801  | 0.904829  | -1.784986 |

|                                         |           |           |           |                                       |           |           |           |
|-----------------------------------------|-----------|-----------|-----------|---------------------------------------|-----------|-----------|-----------|
| Cl                                      | 2.206786  | 2.056039  | -0.649666 | H                                     | 3.267709  | 4.307608  | 0.291007  |
| N                                       | 2.076465  | -0.948718 | -0.181389 | Cl                                    | -0.382945 | 1.176346  | -0.515673 |
| C                                       | 1.576357  | -0.767826 | 1.074624  | N                                     | 1.880912  | -0.807942 | -0.144031 |
| O                                       | 0.430479  | -1.139431 | 1.369595  | C                                     | 0.993124  | -1.441754 | 0.686699  |
| C                                       | 2.485168  | -0.161231 | 2.144707  | O                                     | 0.502796  | -2.541680 | 0.381407  |
| H                                       | 3.248617  | 0.460049  | 1.673888  | C                                     | 0.666795  | -0.807161 | 2.034857  |
| C                                       | 1.671265  | 0.709087  | 3.106733  | H                                     | 0.874444  | 0.263178  | 1.997114  |
| H                                       | 0.923633  | 0.108387  | 3.634564  | C                                     | -0.811885 | -1.015372 | 2.384119  |
| H                                       | 2.331711  | 1.156085  | 3.856113  | H                                     | -1.034858 | -2.083545 | 2.476540  |
| H                                       | 1.164046  | 1.525197  | 2.580305  | H                                     | -1.031523 | -0.543357 | 3.347264  |
| C                                       | 3.193027  | -1.313983 | 2.880056  | H                                     | -1.480930 | -0.572464 | 1.635263  |
| H                                       | 3.817056  | -1.900250 | 2.198418  | C                                     | 1.599749  | -1.437149 | 3.085680  |
| H                                       | 3.836117  | -0.917814 | 3.671907  | H                                     | 2.652974  | -1.251782 | 2.850234  |
| H                                       | 2.459462  | -1.985938 | 3.337432  | H                                     | 1.392589  | -1.012562 | 4.072768  |
| C                                       | 1.286495  | -1.646233 | -1.246791 | H                                     | 1.444786  | -2.519552 | 3.138393  |
| C                                       | 0.024214  | -0.875974 | -1.643668 | C                                     | -3.743852 | 1.651868  | 1.144622  |
| C                                       | 0.999492  | -3.100060 | -0.868418 | C                                     | -3.971217 | 0.768509  | -0.108256 |
| H                                       | 1.962362  | -1.646627 | -2.105622 | H                                     | -3.592813 | 1.014650  | 2.023982  |
| H                                       | 0.241457  | 0.181921  | -1.800213 | H                                     | -2.839873 | 2.256168  | 1.012840  |
| H                                       | -0.361298 | -1.282931 | -2.584649 | H                                     | -4.583186 | 2.329452  | 1.353613  |
| H                                       | -0.764235 | -0.964969 | -0.897129 | C                                     | -4.205416 | 1.696092  | -1.326573 |
| H                                       | 1.924036  | -3.636910 | -0.632493 | C                                     | -5.254045 | -0.072594 | 0.119385  |
| H                                       | 0.335398  | -3.152008 | -0.004408 | H                                     | -4.365215 | 1.088249  | -2.225740 |
| H                                       | 0.518983  | -3.608380 | -1.710588 | H                                     | -5.069886 | 2.363832  | -1.207169 |
|                                         |           |           |           | H                                     | -3.316905 | 2.314633  | -1.497413 |
| <b>II</b>                               |           |           |           | H                                     | -6.149047 | 0.533028  | 0.318849  |
| B3LYP-D3BJ/BSI SCF energy in toluene:   |           |           |           | H                                     | -5.453032 | -0.689575 | -0.766315 |
| -1929.573538 a.u.                       |           |           |           | H                                     | -5.100359 | -0.746229 | 0.971365  |
| B3LYP-D3BJ/BSII SCF energy in toluene:  |           |           |           | O                                     | -2.894892 | -0.055613 | -0.326629 |
| -1929.872846 a.u.                       |           |           |           | K                                     | -1.801227 | -2.085021 | -0.838476 |
| B3LYP-D3BJ/BSII free energy in toluene: |           |           |           | C                                     | 2.273854  | -1.477911 | -1.415758 |
| -1929.515230 a.u.                       |           |           |           | C                                     | 3.790350  | -1.635031 | -1.530350 |
|                                         |           |           |           | C                                     | 1.685984  | -0.767849 | -2.636990 |
| C                                       | 3.916085  | 2.259474  | 0.482889  | H                                     | 1.828152  | -2.469244 | -1.332069 |
| C                                       | 3.538882  | 0.920702  | 0.389172  | H                                     | 4.204162  | -2.119079 | -0.640645 |
| C                                       | 2.235871  | 0.567699  | 0.025139  | H                                     | 4.024309  | -2.261786 | -2.396864 |
| C                                       | 1.297822  | 1.589481  | -0.218444 | H                                     | 4.291654  | -0.673379 | -1.672804 |
| C                                       | 1.671901  | 2.929164  | -0.118287 | H                                     | 0.597017  | -0.689763 | -2.578087 |
| C                                       | 2.983165  | 3.262449  | 0.219969  | H                                     | 2.084808  | 0.245784  | -2.742266 |
| H                                       | 4.931728  | 2.515158  | 0.766799  | H                                     | 1.942380  | -1.324900 | -3.543632 |
| H                                       | 4.249283  | 0.131689  | 0.606497  |                                       |           |           |           |
| H                                       | 0.932396  | 3.701526  | -0.299294 | <b>IM3</b>                            |           |           |           |
|                                         |           |           |           | B3LYP-D3BJ/BSI SCF energy in toluene: |           |           |           |

|                                         |           |           |           |   |           |           |           |
|-----------------------------------------|-----------|-----------|-----------|---|-----------|-----------|-----------|
| -518.269038 a.u.                        |           |           |           | C | -0.899100 | 0.643793  | 0.000017  |
| B3LYP-D3BJ/BSII SCF energy in toluene:  |           |           |           | C | -0.850365 | -0.747173 | 0.000223  |
| -518.405681 a.u.                        |           |           |           | C | -1.985820 | -1.532623 | 0.000282  |
| B3LYP-D3BJ/BSII free energy in toluene: |           |           |           | C | -3.239054 | -0.901060 | 0.000139  |
| -518.242331 a.u.                        |           |           |           | H | -4.277071 | 0.985643  | -0.000166 |
|                                         |           |           |           | H | -2.215136 | 2.359339  | -0.000283 |
|                                         |           |           |           | H | -1.916668 | -2.617231 | 0.000450  |
| C                                       | -3.358733 | 0.588565  | 0.029090  | H | -4.148162 | -1.495124 | 0.000186  |
| C                                       | -2.136889 | 1.255330  | 0.090924  | N | 0.291842  | 1.388598  | -0.000059 |
| C                                       | -0.922076 | 0.544731  | -0.012969 | H | 0.224567  | 2.399268  | -0.000010 |
| C                                       | -1.045676 | -0.825871 | -0.175682 | C | 1.577577  | 0.896925  | 0.000147  |
| C                                       | -2.224825 | -1.526608 | -0.242201 | O | 2.543167  | 1.653237  | 0.000337  |
| C                                       | -3.419724 | -0.797172 | -0.137060 | C | 1.738075  | -0.614708 | -0.000020 |
| H                                       | -4.276116 | 1.163196  | 0.111823  | H | 0.552578  | -1.037477 | 0.000276  |
| H                                       | -2.107509 | 2.334854  | 0.222558  | C | 2.392248  | -1.104514 | -1.282181 |
| H                                       | -2.237794 | -2.605284 | -0.371833 | H | 3.395080  | -0.671799 | -1.381336 |
| H                                       | -4.376033 | -1.308835 | -0.184943 | H | 2.487116  | -2.194679 | -1.275583 |
| N                                       | 0.284622  | 1.249270  | 0.054881  | H | 1.812023  | -0.814460 | -2.164191 |
| H                                       | 0.202887  | 2.253188  | 0.165392  | C | 2.393198  | -1.104819 | 1.281523  |
| C                                       | 1.604966  | 0.845067  | -0.038812 | H | 1.813606  | -0.815032 | 2.164036  |
| O                                       | 2.484358  | 1.697717  | 0.013721  | H | 2.488121  | -2.194977 | 1.274565  |
| C                                       | 1.907694  | -0.642053 | -0.152605 | H | 3.396077  | -0.672076 | 1.380068  |
| H                                       | 1.107142  | -1.119931 | -0.732104 |   |           |           |           |
| C                                       | 3.245944  | -0.859529 | -0.859615 |   |           |           |           |
| H                                       | 4.053768  | -0.365899 | -0.313429 |   |           |           |           |
| H                                       | 3.468247  | -1.929317 | -0.923460 |   |           |           |           |
| H                                       | 3.232635  | -0.451691 | -1.874911 |   |           |           |           |
| C                                       | 1.904943  | -1.257273 | 1.259944  |   |           |           |           |
| H                                       | 0.941162  | -1.124163 | 1.759769  |   |           |           |           |
| H                                       | 2.110048  | -2.330798 | 1.203216  |   |           |           |           |
| H                                       | 2.680607  | -0.793076 | 1.877902  |   |           |           |           |

#### IM4

B3LYP-D3BJ/BSI SCF energy in toluene:

-518.304335 a.u.

B3LYP-D3BJ/BSII SCF energy in toluene:

-518.441994 a.u.

B3LYP-D3BJ/BSII free energy in toluene:

-518.279913 a.u.

#### TS2

B3LYP-D3BJ/BSI SCF energy in toluene:

-518.261352 a.u.

B3LYP-D3BJ/BSII SCF energy in toluene:

-518.398184 a.u.

B3LYP-D3BJ/BSII free energy in toluene:

-518.240169 a.u.

C -3.308904 0.493958 -0.000057

C -2.151249 1.273976 -0.000121

C -3.179228 0.457024 0.515580

C -1.953404 1.111778 0.608332

C -0.829486 0.606681 -0.061636

C -0.957327 -0.556569 -0.834565

C -2.181534 -1.219566 -0.899621

C -3.298605 -0.718598 -0.228907

H -4.041359 0.861442 1.037788

H -1.851956 2.013009 1.206199

H -2.265392 -2.122412 -1.497525

H -4.252090 -1.233453 -0.291597

N 0.390057 1.308235 0.039470

|   |           |           |           |   |          |           |           |
|---|-----------|-----------|-----------|---|----------|-----------|-----------|
| H | 0.335389  | 2.311531  | -0.090272 | H | 3.141880 | -2.164072 | -0.512461 |
| C | 1.682278  | 0.826323  | -0.163077 | H | 3.702938 | -0.551970 | -1.047965 |
| O | 2.543513  | 1.584831  | -0.631087 | C | 1.248632 | -1.270546 | 1.322839  |
| C | 2.016050  | -0.522843 | 0.280654  | H | 0.510532 | -0.650216 | 1.833373  |
| H | -0.103218 | -0.928702 | -1.389800 | H | 0.717518 | -2.133375 | 0.896519  |
| C | 3.291960  | -1.118469 | -0.211555 | H | 1.942774 | -1.673728 | 2.072099  |
| H | 4.048472  | -1.135637 | 0.587784  |   |          |           |           |

## 8. Reference

1. R.-Q. Guo, C.-L. Zhu, Z. Sheng, Y.-Z. Li, W. Yin, C.-H. Chu, *Tetrahedron Lett.* 2015, **56**, 6223.
2. C. Wang, R.-P. Qi, H.-X. Xue, Y.-X. Shen, M. Chang, Y.-Q. Chen, R. Wang, Z.-Q. Xu, Visible-Light-Promoted C(sp<sup>3</sup>)-H Alkylation by Intermolecular Charge Transfer: Preparation of Unnatural  $\alpha$ -Amino Acids and Late-Stage Modification of Peptides, *Angew. Chem. Int. Ed.* 2020, **59**, 7461–7466.
3. J.-C. Hsieh, A.-Y. Cheng, J.-H. Fu and T.-W. Kang, Copper-Catalyzed Domino Coupling Reaction: an Efficient Method to Synthesize Oxindoles, *Org. Biomol. Chem.*, 2012, **10**, 6404–6409.
4. H. Qin, Y.-Y. Miao, K. Zhang, J. Xu, H.-P. Sun, W.-Y. Liu, F. Feng, W. Qu, A convenient cyclopropanation process of oxindoles via bromoethylsulfonium salt, *Tetrahedron.*, 2018, **74**, 6809–6814.
5. J.-X. Qiao, T.-C. Wang, R. Ruel, C. Thibeault, A. L'Heureux, W.-A. Schumacher, S.-A. Spronk, S. Hiebert, G. Bouthillier, J. Lloyd, Z. Pi, D.-M. Schnur, L.-M. Abell, J. Hua, L.-A. Price, E. Liu, Q. Wu, T. E. Steinbacher, J.-S. Bostwick, M. Chang, J. Zheng, Q. Gao, B. Ma, P.-A. McDonnell, C.-S. Huang, R. Reh fuss, R.-R. Wexler, P.-Y.-S. Lam, Conformationally Constrained ortho-Anilino Diaryl Ureas: Discovery of 1-(2-(1'-Neopentylspiro[indoline-3,4'-piperidine]-1-yl)phenyl)-3-(4-(trifluoromethoxy)phenyl)urea, a Potent, Selective, and Bioavailable P2Y1 Antagonist, *J. Med. Chem.*, 2013, **56**, 9275.
6. A.-T. Vu, S.-T. Cohn, P. Zhang, C.-Y. Kim, P.-E. Mahaney, J.-A. Bray, G.-H. Johnston, E.-J. Koury, S.-A. Cosmi, D.-C. Deecher, V.-A. Smith, 1-(Indolin-1-yl)-1-phenyl-3-propan-2-olamines as Potent and Selective Norepinephrine Reuptake Inhibitors, *J. Med. Chem.*, 2010, **53**, 2051.
7. H. Tye, U. Guertler, M.-H. Hofmann, M. Mayer, G. Rast, M.-P. Sanderson, O. Schaaf, M. Treu and S.-K. Zahn, Discovery of novel amino-pyrimidine inhibitors of the insulin-like growth factor 1 (IGF1R) and insulin receptor (INSR) kinases; parallel optimization of cell potency and hERG inhibition, *MedChemComm.*, 2015, **6**, 1244-1251.
8. H. K. Abd El-Aal, A. A. Khalaf. Friedel-Crafts chemistry. Part 40. An expedient novel synthesis of some dibenz-azepines,-azocines, 11H-benzo [f] pyrido [2, 3-b] azepines and 6H-benzo [g] pyrido [2, 3-c] azocines. *Arkivoc*, 2013, **4**, 398–405.
9. A. Mukherjee, R.-B. Dateer, R. Chaudhuri, S. Bhunia, S.-N. Karad and R.-S. Liu, Gold-Catalyzed 1,2- Difunctionalizations of Aminoalkynes Using Only N- and O-Containing Oxidants, *J. Am. Chem. Soc.*, 2011, **133**, 15372–15375.
10. K.-Q. Chen, B.-B. Zhang, Z.-X. Wang and X.-Y. Chen, N-Heterocyclic Nitreniums Can Be Employed as Photoredox Catalysts for the Single-Electron Reduction of Aryl Halides, *Org. Lett.*, 2022, **24**, 4598–4602.
11. M. J. Frisch, G. W. Trucks, H. B. Schlegel, G. E. Scuseria, M. A. Robb, J. R. Cheeseman, G. Scalmani,

V. Barone, G. A. Petersson, H. Nakatsuji, X. Li, M. Caricato, A. V. Marenich, J. Bloino, B. G. Janesko, R. Gomperts, B. Mennucci, H. P. Hratchian, J. V. Ortiz, A. F. Izmaylov, J. L. Sonnenberg, D. Williams-Young, F. Ding, F. Lipparini, F. Egidi, J. Goings, B. Peng, A. Petrone, T. Henderson, D. Ranasinghe, V. G. Zakrzewski, J. Gao, N. Rega, G. Zheng, W. Liang, M. Hada, M. Ehara, K. Toyota, R. Fukuda, J. Hasegawa, M. Ishida, T. Nakajima, Y. Honda, O. Kitao, H. Nakai, T. Vreven, K. Throssell, J. A. Montgomery, Jr., J. E. Peralta, F. Ogliaro, M. J. Bearpark, J. J. Heyd, E. N. Brothers, K. N. Kudin, V. N. Staroverov, T. A. Keith, R. Kobayashi, J. Normand, K. Raghavachari, A. P. Rendell, J. C. Burant, S. S. Iyengar, J. Tomasi, M. Cossi, J. M. Millam, M. Klene, C. Adamo, R. Cammi, J. W. Ochterski, R. L. Martin, K. Morokuma, O. Farkas, J. B. Foresman, and D. J. Fox, Gaussian 16, Rev. A.03; Gaussian, Inc.: Wallingford, CT, 2016.

12. P. J. Stephens, F. J. Devlin, C. F. Chabalowski, M. J. Frisch, Ab initio calculation of vibrational absorption and circular dichroism spectra using density functional force fields, *J. Phys. Chem.*, 1994, **98**, 11623–11627.

13. (a) S. Grimme, J. Antony, S. Ehrlich, H. Krieg, A consistent and accurate ab initio parametrization of density functional dispersion correction (DFT-D) for the 94 elements H-Pu, *J. Chem. Phys.*, 2010, **132**, 154104–154119. (b) S. Grimme, S. Ehrlich, L. Goerigk, Effect of the damping function in dispersion corrected density functional theory, *J. Comput. Chem.*, 2011, **32**, 1456-1465.

14. A. V. Marenich, C. J. Cramer, D. G. Truhlar, Universal solvation model based on solute electron density and on a continuum model of the solvent defined by the bulk dielectric constant and atomic surface tensions, *J. Phys. Chem. B.*, 2009, **113**, 6378-6396.

15. (a) E. Runge, E. K. U. Gross, Density-functional theory for time-dependent systems, *Phys. Rev. Lett.*, 1984, **52**, 997-1000. (b) R. Bauernschmitt, R. Ahlrichs, Treatment of electronic excitations within the adiabatic approximation of time dependent density functional theory, *Chem. Phys. Lett.*, 1996, **256**, 454-464. (c) R. E. Stratmann, G. E. Scuseria, M. J. Frisch, An efficient implementation of time-dependent density-functional theory for the calculation of excitation energies of large molecules, *J. Chem. Phys.*, 1998, **109**, 8218-8224.

16. C. Y. Legault, *CYLView, version 1.0 b*; Université de Sherbrooke: Sherbrooke, Quebec, Canada, 2009. <http://www.cylview.org>.
